1 **Multi-omics analysis demonstrates a critical role for GLP methyltransferase in**  
2 **transcriptional repression during oogenesis**

3

4 Hannah Demond<sup>1,2</sup>, Courtney W. Hanna<sup>1,3,4</sup>, Juan Castillo-Fernandez<sup>1</sup>, Fátima Santos<sup>1,3</sup>, Evangelia K.  
5 Papachristou<sup>5</sup>, Anne Segonds-Pichon<sup>6</sup>, Kamal Kishore<sup>5</sup>, Clive S. D'Santos<sup>5</sup>, Gavin Kelsey<sup>1,3,7\*</sup>

6 <sup>1</sup>Epigenetics Programme, Babraham Institute, Cambridge CB22 3AT, United Kingdom

7 <sup>2</sup>Millennium Institute on Immunology and Immunotherapy. Laboratory of Integrative Biology (LIBi),  
8 Centro de Excelencia en Medicina Traslacional (CEMT), Scientific and Technological Bioresource  
9 Nucleus (BIOREN), Universidad de La Frontera, Temuco, Chile

10 <sup>3</sup>Centre for Trophoblast Research, University of Cambridge, Cambridge CB2 3EG, United Kingdom

11 <sup>4</sup>Department of Physiology, Development and Neuroscience, University of Cambridge, Cambridge CB2  
12 3EG, United Kingdom

13 <sup>5</sup>Cancer Research UK Cambridge Institute, Li Ka Shing Centre, University of Cambridge, Robinson Way,  
14 Cambridge CB2 0RE, United Kingdom

15 <sup>6</sup>Bioinformatics Group, Babraham Institute, Cambridge CB22 3AT, United Kingdom

16 <sup>7</sup>Wellcome-MRC Institute of Metabolic Science-Metabolic Research Laboratories, Cambridge CB2  
17 0QQ, United Kingdom

18

19 \*Corresponding author: Gavin Kelsey ([gavin.kelsey@babraham.ac.uk](mailto:gavin.kelsey@babraham.ac.uk))

## 20 **Abstract**

21 GLP (EHMT1) is a multifunctional protein, best known for its role as an H3K9me1 and H3K9me2  
22 methyltransferase through its reportedly obligatory dimerization with G9A (EHMT2). Here, we  
23 investigate the role of GLP in the oocyte in comparison to G9A using oocyte-specific conditional  
24 knockout mouse models (*G9a* cKO, *Glp* cKO, *G9a-Glp* cDKO). Loss of GLP in *Glp* cKO and *G9a-Glp* cDKO  
25 oocytes re-capitulated meiotic defects observed in the *G9a* cKO; however, there was a significant  
26 impairment in oocyte maturation and developmental competence in *Glp* cKO and *G9a-Glp* cDKO  
27 oocytes beyond that observed in the *G9a* cKO. Consequently, loss of GLP in oogenesis results upon  
28 fertilisation in mid-gestation embryonic lethality. To assess the molecular functions of GLP and G9A,  
29 we applied a multi-omics approach, supported by immunofluorescence, to identify changes in  
30 epigenomic, transcriptomic and proteomic signatures in cKO oocytes. H3K9me2 was equally depleted  
31 in all cKO oocytes, whereas H3K9me1 was decreased only upon loss of GLP. The transcriptome, DNA  
32 methylome and proteome were markedly more affected in *G9a-Glp* cDKO than *G9a* cKO oocytes, with  
33 transcriptional de-repression associated with increased protein abundance and gains in genic DNA  
34 methylation in *G9a-Glp* cDKO oocytes. Together, our findings suggest that GLP contributes to  
35 transcriptional repression in the oocyte, independent of G9A, and is critical for oogenesis and oocyte  
36 developmental competence.

37

## 38 **Keywords**

39 Oocyte, epigenetics, histone modification, histone methyltransferase, H3K9 methylation, DNA  
40 methylation, GLP/EHMT1, proteome

## 41 Introduction

42 The mammalian germline is the context for widespread epigenetic changes, in which the somatic  
43 epigenetic signature is erased and replaced by a germline signature that is distinct in sperm and  
44 oocyte. Prior to the onset of gametogenesis, primordial germ cells undergo extensive erasure of many  
45 epigenetic marks, such as DNA methylation (Guibert et al. 2012; Seisenberger et al. 2012) and histone-  
46 3 lysine-9 dimethylation (H3K9me2) (Seki et al. 2005). In the oocyte, epigenetic marks are reset  
47 postnatally during oocyte growth, resulting in a unique DNA methylation and histone modification  
48 landscape (Hanna et al. 2018a). As the oocyte does not divide during these processes, the oocyte  
49 serves as an informative system to study epigenetic regulation. Importantly, resetting of epigenetic  
50 marks is essential to support successful oogenesis, the oocyte-to-embryo transition, and subsequent  
51 embryonic development (e.g. Kaneda et al. 2004; Andreu-Vieyra et al. 2010; Eymery et al. 2016; Kim  
52 et al. 2016; Xu et al. 2019).

53 G9A (EHMT2) and GLP (EHMT1) are best known as histone methyltransferases, although they modify  
54 non-histone targets as well (Rathert et al. 2008). They preferentially function as heterodimers *in vivo*  
55 and comprise the main H3K9 mono- and di-methyltransferases in euchromatin (Tachibana et al. 2001;  
56 Peters et al. 2003; Rice et al. 2003; Tachibana et al. 2005; Tachibana et al. 2008). Both proteins contain  
57 a SET-domain, required for their catalytic activity as methyltransferases and heterodimer formation,  
58 as well as an ankyrin repeat domain that enables binding to H3K9me1 and H3K9me2 (Tachibana et al.  
59 2001; Collins et al. 2008). G9A and GLP have been implicated in a number of cellular processes,  
60 including gene repression, higher-order chromatin structure, retrotransposon silencing and DNA  
61 methylation, not all of which depend on their catalytic activity (Dong et al. 2008; Shinkai and Tachibana  
62 2011; Bittencourt et al. 2014; Auclair et al. 2016; Au Yeung et al. 2019; Jiang et al. 2020). G9A and GLP  
63 have been suggested to be inter-dependent, as H3K9me1 and H3K9me2 levels are equally depleted in  
64 *G9a* KO and *Glp* KO embryonic stem cells (ESCs) (Tachibana et al. 2005). Moreover, *G9a* and *Glp* mouse  
65 knock-outs (KOs) show very similar phenotypes with embryos displaying loss of H3K9me2, growth

66 retardation and embryonic lethality between embryonic day (E)8.5 and E12.5 (Tachibana et al. 2002;  
67 Tachibana et al. 2005). As such, studies often do not distinguish between G9A and GLP, or solely  
68 consider G9A, resulting in limited knowledge of GLP function. However, recent findings indicate that  
69 GLP can act independently of G9A in post fertilisation, revealing a role for GLP in targeting H3K27me2  
70 to the paternal pronucleus in the zygote (Meng et al. 2020).

71 In the oocyte, loss of G9A impairs maturation and meiosis, with consequences for preimplantation  
72 development, leading to partial embryonic lethality (Au Yeung et al. 2019). However, some embryos  
73 lacking oocyte-derived G9A develop to term and result in healthy pups. The role of GLP in the oocyte  
74 and its impact on embryo development remain unclear. To investigate the importance of GLP in  
75 oogenesis and compare its function to G9A, we used oocyte cKO mice for *G9a* and *Glp*, as well as a  
76 *G9a-Glp* cDKO. While loss of GLP re-capitulated the meiotic defects observed in the *G9a* cKO (Au Yeung  
77 et al. 2019), *Glp* cKO and *G9a-Glp* cKO oocytes showed a significant impairment in oocyte maturation  
78 and developmental competence beyond that observed in the *G9a* cKO. Using a multi-omics approach  
79 to evaluate changes in H3K9 methylation, gene expression, DNA methylation and protein abundance,  
80 we reveal that loss of GLP results in transcriptional de-repression, leading to substantial changes in  
81 the oocyte methylome and proteome. Our findings demonstrate that GLP has a unique and essential  
82 function in the oocyte.

83

## 84 **Results**

### 85 **GLP and G9A function during oocyte maturation and meiosis**

86 To analyse the function of GLP in oocytes and compare it to that of G9A, we generated three cKO  
87 models. Mice carrying floxed alleles for *G9a* (*G9a* cKO) (Sampath et al. 2007), *Glp* (*Glp* cKO) (Schaefer  
88 et al. 2009) or both *G9a* and *Glp* (*G9a-Glp* cDKO) were crossed with a *Zp3-Cre* driver, which is  
89 expressed exclusively in growing oocytes after postnatal day 5 (Lan et al. 2004). During oocyte

90 maturation in the ovary, the germinal vesicle (GV) oocyte undergoes a change in chromatin  
91 conformation from a non-surrounded nucleolus (NSN) to a surrounded nucleolus (SN) stage that  
92 coincides with global transcriptional silencing (Zuccotti et al. 2005). In control animals,  
93 immunofluorescence (IF) analysis showed that G9A and GLP are detected throughout the nucleus of  
94 NSN oocytes, but were no longer detectable by the mature SN stage (**Supplemental Fig. S1A,B**). In  
95 *G9a* cKO oocytes, G9A protein was lost in NSN oocytes, while GLP remained detectable (**Fig. 1A**). In  
96 contrast, *Glp* cKO oocytes were depleted for both G9A and GLP, similar to *G9a-Glp* cDKO oocytes (**Fig.**  
97 **1A**), indicating that GLP is required for G9A stability but not *vice versa*, as was previously shown in  
98 mouse ESCs (Tachibana et al. 2005).

99 Loss of G9A has been shown to affect oocyte maturation and meiosis (Au Yeung et al. 2019). To assess  
100 whether loss of GLP has additional effects on developmental capacity of the oocyte, we first analysed  
101 the NSN-to-SN maturation rate by staining fully-grown GV oocytes with DAPI and staging them  
102 according to chromatin conformation. In *Glp* cKO and *G9a-Glp* cDKO oocytes from 12-week old  
103 females the proportion of SN oocytes was significantly lower than in *G9a* cKO and control oocytes (**Fig.**  
104 **1B**), indicating that loss of GLP has a stronger effect on oocyte maturation than loss of G9A alone.

105 To determine whether GLP is required for meiosis, we analysed spindle conformation and  
106 chromosome alignment of ovulated metaphase II (MII) oocytes after hormonal stimulation. All three  
107 cKO models showed an increase in abnormal chromatin configuration and spindle alignment,  
108 compared to controls (**Fig. 1C**). Different meiotic abnormalities were observed, ranging from  
109 chromosomes that were located together but not aligned (“aggregates”), chromosome alignments  
110 where one or several chromosomes were misaligned, to chromosomes scattered throughout the  
111 nucleus (**Fig. 1C** and **Supplemental Fig. S1C**). Spindle abnormalities included collapsed, mono- or  
112 multipolar spindles. No significant differences were observed between the different cKO models.

113 Taken together, the results show that loss of G9A had mild effects on oocyte maturation compared to  
114 the significant impairment caused by loss of GLP, while effects on meiosis were similar.

115

116 **Loss of maternal GLP but not G9A results in prenatal developmental arrest**

117 To assess whether loss of GLP also compromises competence of oocytes, we examined developmental  
118 progression after fertilisation. Embryos were collected at embryonic day (E)3.5 from cKO females  
119 naturally mated with wildtype (WT) C57Bl/6BabR males and scored according to developmental stage.  
120 The majority of embryos from control females had reached the blastocyst stage (**Fig. 1D**). In  
121 comparison, fewer embryos derived from cKO oocytes progressed to blastocysts, with the proportion  
122 of maternal *G9a-Glp* cDKO blastocysts significantly reduced, and the proportion of dead and  
123 unfertilized oocytes in maternal *G9a-Glp* cDKO embryos is significantly increased.

124 To determine the stage of embryo arrest, embryos were collected from superovulated, naturally  
125 mated cKO females at E1.5 and cultured *in vitro* for 3 days until day E4.5. Already at E1.5 a difference  
126 was observed, all three cKO models having a higher proportion of unfertilized oocytes and 1-cell  
127 embryos than controls. The *G9a-Glp* cDKO again showed the strongest phenotype, having significantly  
128 fewer 2-cell embryos than controls (**Supplemental Fig. S2A**). Fertilized embryos (1- and 2-cell) were  
129 selected for *in vitro* culture: none of the embryos from *Glp* cKO or *G9a-Glp* cDKO oocytes developed  
130 to blastocysts, arresting at earlier stages (1 to 4-cell stage) by E3.5 (**Supplemental Fig. S2B,C**). In  
131 contrast, 42.9% maternal *G9a* cKO embryos developed at least to morulae by E3.5 (**Supplemental Fig.**  
132 **S2B,C**). However, this was significantly less than controls where 91.1% of embryos reached morula or  
133 blastocyst stages by E3.5. These findings reveal that embryos derived from *G9a* cKO oocytes show  
134 reduced survival through preimplantation development, whereas preimplantation developmental  
135 competence of *Glp* cKO and *G9a-Glp* cDKO oocytes was severely impaired.

136 A small percentage of embryos from *Glp* cKO oocytes did progress *in vivo* to blastocysts, therefore we  
137 examined the implantation and development of embryos after natural mating. In line with findings  
138 above, there were significantly fewer implanted embryos at E6.5 from *Glp* cKO and *G9a-Glp* cDKO  
139 oocytes than *G9a* cKO and controls (**Fig. 1E**). At E8.5, 3 maternal *Glp* cKO and 6 *G9a-Glp* cDKO embryos

140 were recovered: all were highly abnormal, with no clear tissue types or only extraembryonic tissue  
141 (**Supplemental Fig. S2D,E**). In contrast, although some abnormalities (predominantly developmental  
142 delay, but also abnormal morphology) were observed among E8.5 embryos from *G9a* cKO oocytes,  
143 most appeared normal (**Supplemental Fig. S2D,E**). By E12.5, 55% (11/25) embryos from *G9a* cKO  
144 oocytes were grossly abnormal or exhibited developmental delay (**Supplemental Fig. S2F,G**). In *G9a*-  
145 *Glp* cDKO females, with one exception, all embryos had died and only resorption sites were observed  
146 (**Supplemental Fig. S2F**).

147 Finally, we analysed the number of live pups born after mating cKO females with WT males: no pups  
148 were born to *Glp* cKO or *G9a-Glp* cDKO females, but *G9a* cKO females did give birth to a mean of 3.46  
149 healthy pups per litter, a significantly reduced litter size compared to controls (**Fig. 1F**). These results  
150 confirm previous findings in showing that although loss of G9A in the oocyte affects developmental  
151 capacity of pre- and post-implantation embryos, some embryos develop normally resulting in birth of  
152 healthy pups (Au Yeung et al. 2019). Our results show loss of GLP in the oocyte severely impairs  
153 embryonic development and, although a small proportion of embryos reach the blastocyst stage and  
154 can implant, they die *in utero* between E8.5 and E12.5.

155

#### 156 **Differential effects of loss of GLP or G9A on H3K9 methylation**

157 GLP and G9A are H3K9 methyltransferases required for establishment of H3K9me1 and H3K9me2 in  
158 euchromatin (Tachibana et al. 2001; Tachibana et al. 2002; Tachibana et al. 2005). Therefore, we  
159 examined H3K9 methylation in NSN-stage GV oocytes from cKO females (12 weeks) by IF. We tested  
160 each antibody in three replicate experiments, each with oocytes from mice from a different litter. In  
161 total, we analysed between 13 and 32 NSN oocytes per genotype per antibody (average 22.7).  
162 Consistent with previous reports (Peters et al. 2003; Rice et al. 2003), H3K9me1 and H3K9me2 were  
163 localized mainly in euchromatic chromatin of NSN oocytes, whereas H3K9me3 was enriched in  
164 heterochromatic foci (**Fig. 2A**). Fluorescence intensity of H3K9me1 was significantly reduced in *Glp*

165 cKO and *G9a-Glp* cDKO oocytes compared to controls, but not in *G9a* cKO oocytes; in contrast,  
166 H3K9me2 decreased significantly in all three cKOs (**Fig. 2A,B**). A small but significant loss of H3K9me3  
167 was observed in *G9a-Glp* cDKO oocytes (**Fig. 2A,B**). Rather than a direct effect, this may result from  
168 loss of H3K9me1, as the H3K9me3 methyltransferase SUV39H requires H3K9me1 as a substrate  
169 (Pinheiro et al. 2012). The loss of H3K9me2, but not H3K9me1 and H3K9me3, had previously been  
170 shown for *G9a* cKO oocytes using different antibodies, demonstrating the consistency of our IF  
171 experiments (Au Yeung et al. 2019)

172 With H3K9me1 and H3K9me2 affected by loss of G9A and/or GLP, we sought to evaluate the genomic  
173 localisation of these marks by ultra low-input native ChIP-seq (ULI-nChIP-seq) in WT GV oocytes from  
174 15 and 25-day old females. We were able to obtain quality ChIP-seq libraries for H3K9me2 (**Fig. 2C**),  
175 but not for H3K9me1. By quantifying 10kb running windows, we observed a reproducible H3K9me2  
176 enrichment between replicates from d15 and d25 WT oocytes, with d25 showing greater enrichment  
177 than d15 GV oocytes (**Fig. 2C, Supplemental Fig. S3A**). H3K9me2-enriched domains in d25 GV oocytes  
178 were defined by merging consecutive 10kb windows with a  $\text{Log}_2\text{RPKM} > 2.5$  (34,192 or 12.5% of total  
179 10kb windows; 12,514 domains; **Fig. 2C, Supplemental Fig. S3B; Supplemental Table S1**). To link  
180 H3K9me2 enrichment to transcription levels, we used published data to define CpG-island (CGI) and  
181 non-CGI promoters of low (FPKM<0.1), medium (FPKM 0.1-1.0) and high (FPKM>1.0) expressed genes  
182 (Veselovska et al. 2015), and then compared the overlap of these promoters with H3K9me2-enriched  
183 or random domains (**Supplemental Fig. S3C**). There was no difference in transcription level between  
184 genes localised to H3K9me2-enriched domains or random domains, thus H3K9me2 enrichment does  
185 not appear linked to transcriptional repression in oocytes.

186 For further molecular analysis of GLP function, we used the *G9a-Glp* cDKO model, which had a slightly  
187 more severe phenotype than the *Glp* cKO. As this small difference between *Glp* cKO and *G9a-Glp* cDKO  
188 oocytes might be caused by residual traces of G9A in the *Glp* cKO oocytes, using *G9a-Glp* cDKO oocytes  
189 allowed us to make a clearer distinction between oocytes depleted of both G9A and GLP or only G9A



190 (*G9a* cKO). To assess the loss of H3K9me2 upon depletion of GLP in the oocyte, we generated ChIP-  
191 seq libraries of GV oocytes from d25 *G9a* cKO, *G9a-Glp* cDKO and littermate control females. Notably,  
192 H3K9me2 libraries from control oocytes were 4.94% of total chromatin, whereas H3K9me2 libraries  
193 from *G9a* cKO and *G9a-Glp* cDKO oocytes were only 0.58% and 0.33%, respectively (**Fig. 2D**),  
194 confirming that H3K9me2 is almost completely absent from cKO oocytes. Principal component  
195 analysis (PCA) of all biological replicates showed that *G9a* cKO and *G9a-Glp* cDKO H3K9me2 replicates  
196 clustered apart from control, d15 WT and d25 WT H3K9me2 replicates (**Supplemental Fig. S3D**). When  
197 comparing enrichment across H3K9me2-enriched domains (+/-5kb), *G9a* cKO and *G9a-Glp* cDKO  
198 showed significant loss of H3K9me2 compared to controls, with enrichment comparable to that in the  
199 IgG control and input (**Fig. 2E**). Furthermore, this effect was specific to H3K9me2-enriched domains,  
200 as there was no observable difference in enrichment between cKOs and controls across a set of  
201 random domains (**Fig. 2E**). There was a similar loss of H3K9me2 in *G9a* cKO and *G9a-Glp* cDKO oocytes,  
202 supporting the IF results that G9A is predominantly required for H3K9me2 in oogenesis.

203

#### 204 **Dysregulation of proteins associated with meiosis, fertilization and oocyte function in *G9a-Glp* cDKO** 205 **oocytes**

206 Beside their role as histone methyltransferases, G9A and GLP are known to methylate non-histone  
207 proteins and, by doing so, can potentially modulate their function, localisation or stability. To assess  
208 whether loss of GLP affects protein abundance in the oocyte, we performed low-input (200 oocytes)  
209 quantitative whole-proteome mass spectrometry isobaric labelling analysis of control, *G9a* cKO and  
210 *G9a-Glp* cDKO GV oocytes. In total, 21,358 peptides were detected at FDR<1% and 3,182 quantified  
211 proteins (**Supplemental Table S2**). Gene ontology (GO) analysis showed enrichment for processes  
212 involved in cellular localization and organization, as well as protein folding, metabolic processes and  
213 fertilization (**Supplemental Fig. 4A**). Furthermore, among the top 50 most abundant proteins, we  
214 detected oocyte-specific proteins such as members of the subcortical maternal complex (PADI6,

215 NLRP5, NLRP14, TLE6, KHDC3, NLRP4F), the zona pellucida (ZP1, ZP2, ZP3), as well as proteins known  
216 to be highly abundant in the oocyte (DNMT1, UHRF1).

217 Comparing *G9a-Glp* cDKO with control oocytes, we identified 187 proteins with a significant change  
218 in abundance ( $P < 0.05$  and  $\text{Log}_2\text{FC} > 0.3$ ; **Fig. 3A, Supplemental Table S2**). In contrast, there were only  
219 38 differentially abundant proteins in *G9a* cKO oocytes, of which 21 overlapped with those in *G9a-Glp*  
220 cDKO oocytes (**Fig. 3B, Supplemental Fig. 4B**). The majority of changing proteins increased in  
221 abundance in both *G9a* cKO (12 down, 26 up) and *G9a-Glp* cDKO oocytes (12 down, 175 up; **Fig. 3A,B**).  
222 Although few proteins were identified to have significant changes in abundance in *G9a* cKO oocytes,  
223 many proteins changing in *G9a-Glp* cDKO oocytes displayed the same directional trend in *G9a* cKO  
224 oocytes (**Fig. 3B**).

225 We detected five known G9A/GLP targets (ACIN1, DNMT1, DNMT3A, MTAL and RUVBL2): none of  
226 these were significantly regulated in cKO oocytes, but this is not entirely unexpected as protein  
227 methylation does not necessarily influence abundance, but rather may affect activity. GO analysis did  
228 not detect any significant enrichment terms amongst the differentially abundant proteins. Even so,  
229 we identified several proteins for which change in abundance may be related to the observed oocyte  
230 phenotypes. Among these, two were meiotic factors according to the MGI Gene Ontology Browser  
231 (CDC25B and SIRT1), while literature research linked a further seven (STAT3, TGON1, SET, IMPDH2,  
232 DSTN, SKA3, ROCK1) to meiosis in the oocyte (**Supplemental Table S2**). Furthermore, proteins involved  
233 in oocyte maturation (ERMP1) and fertilization (ASTL) showed significantly increased abundance, as  
234 well as the candidate oocyte transcriptional regulator HMGB3. Increased abundance of these proteins  
235 may underlie the meiotic spindle abnormalities, impaired oocyte maturation and poor fertilization  
236 rates observed in *G9a-Glp* cKO oocytes. In line with observations in oocyte and embryo development,  
237 the more severe effect in *G9a-Glp* cDKO oocytes suggests unique roles for GLP. The similar but lesser,  
238 non-significant changes in protein abundance observed in *G9a* cKO oocytes suggests that loss of G9A  
239 can be partially compensated by GLP.

240

241 **Transcriptome changes underlie differences in protein abundance in *G9a-Glp* cDKO oocytes**

242 To assess whether the proteome changes may be a consequence of transcriptional changes, we  
243 evaluated gene expression by RNA-seq of *G9a-Glp* cDKO, *G9a* cKO and matched control GV oocytes.  
244 Differential gene expression was determined by DESeq2 analysis followed by filtering for genes with  
245  $\text{Log}_2\text{FC} > 1.5$ . In line with what was observed in the proteome, the vast majority of differentially  
246 expressed genes (DEGs) were upregulated in the *G9a-Glp* cDKO. Again, *G9a-Glp* cDKO oocytes were  
247 more severely affected than *G9a* cKO oocytes, with 330 DEGs (301 up, 29 down; **Fig. 3C, Supplemental**  
248 **Table S3**), in contrast to 79 DEGs in *G9a* cKO oocytes (64 up, 15 down; **Fig. 3D**). Of the *G9a* cKO DEGs,  
249 51 overlapped with *G9a-Glp* cDKO DEGs. We identified three clusters of DEGs: 1) downregulated in  
250 both *G9a* cKO and *G9a-Glp* cDKO; 2) upregulated in both genotypes; and 3) uniquely upregulated in  
251 *G9a-Glp* cDKO (**Fig. 3E**). GO analysis did not show significant category enrichments, but amongst the  
252 deregulated transcripts we identified several transcription factors with a known function in the oocyte  
253 (*Prmt7*, *Etv5*), zygotic genome activation (*Zscan4d*) and embryo development (*Klf4*, *Hoxd1*, *Lmx1a*;  
254 **Supplemental Table S3**). Furthermore, several genes important for oocyte maturation, meiosis and  
255 fertilization were deregulated (*Atrx*, *Fgfr2*, *Prkca*, *Ptgs2*, *Plac1*, *Mt1*), which may underlie some of the  
256 phenotypic effects we see.

257 Using the DEG clusters, we assessed the overlap of DEGs with the distribution of histone modifications  
258 (**Fig. 3F**). There was no significant enrichment for any of the clusters with H3K9me2, further supporting  
259 the conclusion that H3K9me2 does not correlate with transcriptional repression in the oocyte nor  
260 explains the differences in severity between the *G9a* cKO and *G9a-Glp* cDKOs (**Fig. 3F**). Upregulated  
261 DEGs (clusters 2 and 3) were enriched in H3K27me3, which is localised over untranscribed regions in  
262 the oocyte, but not with H3K4me3, which is also broadly localised over untranscribed regions but  
263 exclusive with H3K27me3 (Zheng et al. 2016; Hanna et al. 2018). This finding suggests that upregulated  
264 DEGs are loci that are transitioning from a repressed to active state in cKO oocytes.

265 Both our proteome and transcriptome analysis showed a preferential upregulation of protein and  
266 transcript abundance in *G9a-Glp* cDKO oocytes. To assess whether changes in transcript expression  
267 may be causative for changes in protein abundance, we used gene set enrichment analysis (**Fig. 3G**).  
268 Indeed, proteins with increased abundance were enriched for transcriptionally upregulated genes in  
269 *G9a-Glp* cDKO oocytes, whereas proteins with decreased abundance were enriched for  
270 downregulated genes, although this may not account for all the variation in protein abundance. This  
271 indicates that loss of GLP results in deregulated gene expression, which in turn affects abundance of  
272 the corresponding proteins. Hence, although only a minority of genes appear to be affected by loss of  
273 GLP, these transcriptional changes are likely to be of biological significance.

274

#### 275 **Loss of GLP results in local and distinct DNA methylation changes**

276 G9A-mediated H3K9me2 has been linked to DNA methylation (Tachibana et al. 2008; Zeng et al. 2019),  
277 although genome-wide analysis only detected local DNA methylation changes in *G9a* cKO oocytes and  
278 *G9a* KO embryos (Auclair et al. 2016; Au Yeung et al. 2019). To examine whether loss of GLP affects  
279 DNA methylation establishment in the oocyte, we first analysed global DNA methylation (5mC and  
280 5hmC) by IF. We used a previously well-established method (Santos et al. 2013) and performed two  
281 replicate experiments with oocytes from different litters (average number of oocytes per  
282 genotype = 13). In NSN oocytes, 5mC was observed throughout the nucleus in both euchromatic and  
283 heterochromatic regions (**Fig. 4A**); 5hmC was enriched in heterochromatic foci but also present in  
284 euchromatin (**Fig. 4A**). No changes in localization of 5mC or 5hmC were observed in cKO oocytes.  
285 However, when assessing 5mC fluorescence intensity, there were significant decreases in the *Glp* cKO  
286 and *G9a-Glp* cDKO compared to control oocytes, but not for *G9a* cKO oocytes (**Fig. 4B**). No significant  
287 changes in 5hmC levels were observed in cKO oocytes, although 5hmC levels also appear reduced in  
288 the three cKO models compared to controls. These data suggest that *de novo* DNA methylation may  
289 be impaired upon loss of GLP but not G9A in oocytes.

290 We then explored changes in DNA methylation in greater resolution by whole-genome bisulphite  
291 sequencing (BS-seq) of control, *G9a* cKO and *G9a-Glp* cDKO GV oocytes. In contrast to decreased 5mC  
292 seen by IF, BS-seq did not show significant global changes in DNA methylation (**Supplemental Fig.**  
293 **S5A**). An explanation for this apparent discrepancy is that the genomic regions assessed by the two  
294 methods differ: IF signal reports both euchromatic and heterochromatic fractions of the genome,  
295 while BS-seq data is enriched in euchromatic and non-repetitive regions that can be uniquely mapped  
296 and analysed. These differences highlight the value of using both methods to understand genome-  
297 wide patterns of DNA methylation and may explain previous contradictory findings (Au Yeung et al.  
298 2019; Zeng et al. 2019).

299 Although global DNA methylation levels as detected by BS-seq did not differ, local changes in DNA  
300 methylation were observed after binning the genome into consecutive windows of 100 CpG sites (100-  
301 CpG windows) for analysis. Differential methylation analysis identified 9,187 DMRs in *G9a-Glp* cDKO  
302 oocytes (4.88% of all analysed 100-CpG windows), of which 4,184 (45.5%) were hypermethylated  
303 (mean methylation difference: 35.1%) and 5,003 (54.5%) hypomethylated (mean methylation  
304 difference 25.6%) (**Supplemental Fig. S5B; Supplemental Table S4**). Methylation was more affected  
305 in *G9a-Glp* cDKO than in *G9a* cKO oocytes, with >7 times more DMRs identified: there were 1,252  
306 DMRs (0.67% of analysed 100-CpG windows) in the *G9a* cKO, of which 432 (34.5%) were  
307 hypermethylated (mean methylation difference: 39.4%) and 820 (65.5%) hypomethylated (mean  
308 methylation difference: 33.8%) (**Supplemental Fig. S5C**). The majority of *G9a* cKO DMRs overlapped  
309 *G9a-Glp* cDKO DMRs (**Supplemental Fig. S5D**). Furthermore, not only did the *G9a-Glp* cDKO have more  
310 DMRs, the methylation difference of these DMRs was greater in *G9a-Glp* cDKO oocytes (**Fig. 4C**). This  
311 indicates that while both G9A and GLP are required for normal DNA methylation establishment in the  
312 oocyte, GLP can partially compensate for loss of G9A, but it does not exclude the possibility that GLP  
313 has an additional G9A-independent role in DNA methylation.

314 Between 21 and 38% of 100-CpG windows identified as DMRs cluster and form larger regions that, in  
315 both genotypes, can span genes (**Fig. 4D, Supplemental Fig. S6 and Supplemental Table S4**). In total,  
316 there were 707 hypo- and 869 hyper-methylated domains in *G9a-Glp* cDKO oocytes, with fewer in the  
317 *G9a* cKO (140 hypo- and 66 hyper-methylated domains). To see whether the additional changes in the  
318 *G9a-Glp* cDKO are unique or whether similar (non-significant) trends are present in the *G9a* cKO, we  
319 performed unsupervised cluster analysis of DNA methylation of the cDKO domains (**Fig. 4E**). For both  
320 hypo- and hypermethylated domains, we identified domains common to both cKOs (523 hypo, 590  
321 hyper) and domains unique to the *G9a-Glp* cDKO (229 hypo, 279 hyper; **Fig. 4D,E; Supplemental Fig.**  
322 **S6**). This indicates that the majority of effects seen in the *G9a-Glp* cDKO are also present in the *G9a*  
323 cKO, although to a lower, often non-significant magnitude. Furthermore, there appears to be a  
324 potentially unique role of GLP in oocyte DNA methylation, although this is likely to be minor compared  
325 to its function compensatory to loss of G9A.

326 To assess this possibility in more detail, we analysed the regions of the genome affected by DNA  
327 methylation changes. While hypermethylated DMRs show similar overlap with genic and intergenic  
328 regions, hypomethylated DMRs are enriched in genic regions (**Supplemental Fig. S4E**). This is  
329 expected, as hypomethylated DMRs are found in regions that are methylated in control oocytes and  
330 it is well established that DNA methylation localises predominantly to transcribed genes in oocytes  
331 (Veselovska et al. 2015). To assess how DNA methylation changes correlate with underlying histone  
332 modifications, we tested the overlap of DMRs with H3K9me2, H3K27me3 and H3K4me3 (**Fig. 4F**). The  
333 majority of DMRs did not overlap regions with H3K9me2 and there was no clear distinction between  
334 hyper- and hypomethylated DMRs, indicating that most DNA methylation changes in cKO oocytes are  
335 unlikely to be a direct consequence of loss of H3K9me2. Interestingly, hypermethylated DMRs were  
336 strongly enriched for H3K27me3, compared to hypomethylated DMRs. Importantly, this enrichment  
337 was not seen for H3K4me3, although both are enriched in regions of the genome lacking DNA  
338 methylation. Because H3K27me3 and DNA methylation are mutually exclusive, this result may indicate  
339 a localised redistribution of the two marks in cKOs.

340 As transcription is linked to the deposition of gene-body DNA methylation in the mouse oocyte, we  
341 analysed the correlation between expression and DNA methylation changes. Consistently, expression  
342 changes of DEGs positively correlated with gene-body DNA methylation changes in *G9a-Glp* cDKO  
343 oocytes (**Fig. 4G**). In contrast, when evaluating genes with differential methylation, the correlation  
344 was much weaker (**Supplemental Fig. S5F**). These trends were similar in *G9a* cKO oocytes  
345 (**Supplemental Fig. S5G,H**). This shows that the transcriptional changes observed in *G9a-Glp* cDKO  
346 oocytes impact the associated genic DNA methylation; however, this association does not explain  
347 most of the DNA methylation changes in *G9a-Glp* cDKO oocytes, thus other mechanisms likely underlie  
348 the majority of changes observed.

349 Since G9A and GLP can interact with UHRF1 (Kim et al. 2009; Ferry et al. 2017), we also investigated  
350 the overlap of DMRs with regions that are hypomethylated in *Uhrf1* cKO oocytes (Maenohara et al.  
351 2017). We compared the overlap of *G9a* cKO and *G9a-Glp* cDKO hypomethylated DMRs with regions  
352 hypomethylated in *Uhrf1* cKO oocytes, random probes and random probes that are highly methylated  
353 in control oocytes, as these are the regions most likely affected by loss of methylation. We observed  
354 that both *G9a* cKO and *G9a-Glp* cDKO hypomethylated DMRs strongly overlap with *Uhrf1*  
355 hypomethylated regions compared to random and random-methylated probes (**Fig. 4H**). These data  
356 suggest that loss of G9A and GLP may disturb a subset of UHRF1-mediated methylation. In summary,  
357 our analysis suggests that genic DNA methylation gains seen in *G9a* cKO and *G9a-Glp* cDKO oocytes  
358 occur largely as a consequence to gene de-repression, while losses of DNA methylation may be linked  
359 to impaired UHRF1-mediated *de novo* DNA methylation activity. These findings highlight that G9A and  
360 GLP are integral to several parallel molecular processes.

361

## 362 Discussion

363 Our study shows that GLP can partially compensate for loss of G9A and additionally has a G9A-  
364 independent role in oogenesis (summarized in **Fig. 5**). We find that GLP is required for oocyte

365 maturation and developmental competence. Few embryos derived from *Glp* cKO oocytes implant and  
366 those that do die mid-gestation. In contrast, embryos from *G9a* cKO oocytes are less affected and  
367 some develop normally into healthy pups. This difference in severity is also reflected at a molecular  
368 level in oocytes, with a marked de-repression of gene expression which is correlated with increased  
369 protein abundance and gains in genic DNA methylation. Notably, the differences between the  
370 genotypes are apparently independent of GLP's function as an H3K9me2 methyltransferase, as  
371 H3K9me2 was equally ablated in all cKOs as measured by IF and ChIP-seq. However, the loss of  
372 H3K9me1 only in the *Glp* cKO and *G9a-Glp* cDKO oocytes suggests that GLP's effect as a transcriptional  
373 repressor could be mediated in part through H3K9me1. Importantly, transcriptional changes do not  
374 explain all observed changes in DNA methylation with a marked overlap of regions that lose DNA  
375 methylation with those that are dependent on UHRF1, suggesting G9A and GLP may play a role in  
376 directing some UHRF1-facilitated DNA methylation.

377 To consider the molecular mechanisms underlying the observed phenotypes, it is important to  
378 appreciate that G9A and GLP are proteins with multiple functions. Although best known as histone  
379 methyltransferases, they can methylate and alter the function of non-histone proteins (Shinkai and  
380 Tachibana 2011; Scheer and Zaph 2017). Nevertheless, the strong correlation we observed between  
381 changes in transcript and protein abundance in *G9a* and *G9a/Glp* cKO oocytes argues that the changes  
382 in protein abundance are likely attributable to altered genomic regulation rather than G9A/GLP  
383 directly modulating protein stability.

384 Loss of G9A and GLP resulted in transcriptional upregulation, supporting previous reports that  
385 G9A/GLP act as repressors (Tachibana et al. 2002; Tachibana et al. 2005). It is unlikely that this can be  
386 attributed to loss of H3K9me2, because of the small number of genes that were upregulated despite  
387 almost complete ablation of H3K9me2, and because of the significant transcriptional differences  
388 between the *G9a* cKO and *G9a-Glp* cDKO despite similar deficits in H3K9me2. Alternatively, the effects  
389 may be mediated indirectly by G9A/GLP modulating activity of transcriptional repressors or through



390 other chromatin changes, such as H3K9me1 or potentially H3K27me2. Further elucidation of whether  
391 changes in these repressive marks may be linked to transcriptional de-repression remains a challenge,  
392 due to a lack of robust antibodies for ULI-ChIP-seq. We also observed upregulation of some  
393 developmental transcription factors, suggesting that some gene expression changes reflect  
394 illegitimate expression of such factors in oocytes. The extensive transcriptional de-repression in the  
395 *G9a-Glp* cDKO is associated with impaired developmental capacity of the oocyte, resulting in  
396 decreased oocyte maturation, impaired fertilization and abnormal embryo development.

397 G9A and GLP have been linked to DNA methylation in multiple studies. In the embryo, loss of G9A  
398 leads to hypomethylation of a subset of CGI promoters (Auclair et al. 2016). In the oocyte, we and  
399 others do not see widespread hypomethylation (Au Yeung et al. 2019) but, instead, local sites of hypo-  
400 and hypermethylation. A variety of mechanisms could underpin these changes. In the oocyte, *de novo*  
401 DNA methylation requires transcription (Kobayashi et al. 2012; Veselovska et al. 2015). The  
402 transcriptional changes in *G9a* cKO and *G9a-Glp* cDKO oocytes correlate with DNA methylation  
403 changes, indicating that upregulated gene expression is responsible for some of the hypermethylation  
404 observed. The significant localisation of *G9a* cKO and *G9a-Glp* cDKO de-repressed genes and  
405 hypermethylated regions with H3K27me3 suggest that the loss of G9A/GLP may impair the repressive  
406 chromatin landscape in a subset of regions the oocyte, which could reflect its action in depositing  
407 H3K9me1/2, modulating levels of H3K27me2, or activity as a transcriptional repressor. These  
408 mechanisms warrant further study, but possibly in other cell contexts because determining cause  
409 versus effect would be challenging in the oocyte.

410 A large subset of hypomethylated DMRs overlapped with regions that are hypomethylated in *Uhrf1*  
411 cKO oocytes (Maenohara et al. 2017). UHRF1 function has been associated with G9A and GLP in several  
412 ways, either by direct interaction (Kim et al. 2009) or indirect recruitment through H3K9me2/3 or LIG1  
413 (Rothbart et al. 2012; Rothbart et al. 2013; Ferry et al. 2017). However, it is not clear how these  
414 mechanisms apply in the oocyte because of the absence of DNA replication. Although UHRF1 appears

415 to be required for some genomic DNA methylation, loss of DNMT1 has only minor effects, largely  
416 associated with its role in ensuring symmetric methylation of *de novo* methylated CpGs (Shirane et al.  
417 2013; Maenohara et al. 2017). There are likely to be other mechanisms besides transcriptional  
418 regulation and UHRF1 interactions relevant in the *G9a* cKO and *G9a-Glp* cDKO oocytes. These include  
419 the possibility of a direct interaction of G9A and GLP with DNMT proteins; for example, G9A and GLP  
420 can dimethylate DNMT3A at lysine 44, and methylated DNMT3A can be bound by MPP8, which in turn  
421 binds automethylated GLP, resulting in a DNMT3A-MPP8-GLP silencing complex (Chang et al. 2011).

422 In line with previous studies (Au Yeung et al. 2019), we find that G9A is essential for H3K9me2  
423 establishment in the oocyte, but not H3K9me1. While H3K9me2 depends on the presence of G9A, the  
424 persistence of GLP in the *G9a* cKO was sufficient to establish H3K9me1. Notably, loss of G9A and GLP  
425 did not result in a complete ablation of H3K9me1, indicating that other methyltransferases, such as  
426 PRDM3 and PRDM16, may be active in the oocyte. It remains unclear whether the decrease in  
427 H3K9me1 may be at least partially causative for the transcriptional and DNA methylation changes.  
428 Thus far, H3K9me1 has not been associated with transcriptional repression or *de novo* DNA  
429 methylation, but it is under-characterised relative to H3K9me2/3 due to a lack of validated, high  
430 quality ChIP-grade antibodies.

431 Our results indicate that GLP can compensate for loss of G9A in the oocyte, but also has unique roles.  
432 G9A and GLP are thought to function as heterodimers *in vivo*. Because G9A is unstable on its own, it  
433 is technically challenging to create a model with intact G9A in the absence of GLP. When comparing  
434 transcription, protein and DNA methylation data from *G9a* cKO and *G9a-Glp* cDKO oocytes, some  
435 genes, proteins and genomic regions are progressively affected while others only in *G9a-Glp* cDKO  
436 oocytes. The possibility of a unique, G9A-independent role for GLP is supported by a recent study  
437 which reported that GLP interacts with PRC2 in zygotes to establish H3K27me2 in the paternal  
438 pronucleus (Meng et al. 2020). In our models, the unique function was especially apparent in the  
439 transcriptome, where genes with the greatest fold-change were unique to the *G9a-Glp* cDKO. The

440 upregulation seen in most DEGs was reflected in upregulation of protein abundance in *G9a-Glp* cDKO  
441 oocytes, indicating that although only a relatively small proportion of genes is derepressed upon loss  
442 of G9A and GLP, the transcriptional changes are likely to have a functional impact in the oocyte.  
443 Indeed, we saw changes in gene expression and protein abundance of several genes related to oocyte  
444 maturation and fertilization. But the elevated or inappropriate expression of genes and corresponding  
445 proteins may be more deleterious than down-regulation, as very few genes are likely to be  
446 haploinsufficient in oocytes.

447 Taken together, our results highlight GLP as a multi-functional repressive protein required for the  
448 appropriate establishment of the oocyte transcriptome, epigenome and proteome. Consequently,  
449 GLP is critical for the developmental capacity of the oocyte, independent of G9A.

450

## 451 **Materials and methods**

### 452 **Sample collections**

453 All mice used in this study were bred and maintained in the Babraham Institute Biological Support  
454 Unit. Ambient temperature was ~19-21°C and relative humidity 52%. Lighting was provided on a 12  
455 hour light: 12 hour dark cycle including 15 min 'dawn' and 'dusk' periods of subdued lighting. After  
456 weaning, mice were transferred to individually ventilated cages with 1-5 mice per cage. Mice were fed  
457 CRM (P) VP diet (Special Diet Services) *ad libitum* and received seeds (e.g. sunflower, millet) at the  
458 time of cage-cleaning as part of their environmental enrichment. All experimental procedures were  
459 performed under licences issued by the Home Office (UK) in accordance with the Animals (Scientific  
460 Procedures) Act 1986 and were approved by the Animal Welfare and Ethical Review Body at the  
461 Babraham Institute.

462 Samples were collected from cKO mice carrying a *Zp3-Cre* driver in addition with floxed alleles for *G9a*  
463 (Sampath et al. 2007), *Glp* (Schaefer et al. 2009) or both. Oocytes and embryos collected in M2

464 medium (Sigma-Aldrich, M7167) unless stated otherwise. GV and MII oocytes for IF analysis were  
465 collected from adult mice aged ~12 weeks and fixed in 2% PFA for 15 minutes. MII oocytes were  
466 collected after superovulation. Oocytes used for ChIP-seq, BS-seq and RNA-seq were collected from  
467 ovaries of 22-26 day-old mice using a collagenase/trypsin digest. For ChIP-seq, 300 GV oocytes were  
468 collected in nuclear lysis buffer and pooled from two to four mice for each replicate. For BS-seq and  
469 RNA-seq, replicates were stored in RLT+ buffer (Qiagen). Each replicate comprised all oocytes  
470 collected from one mouse (75-200 GV oocytes). For whole-proteome analysis oocytes were collected  
471 from ovaries of 22-26 day-old mice. To avoid contamination with proteins/peptides from the medium,  
472 oocytes were collected by manual dissection of ovaries in protein-free L15 medium (Thermo Fisher  
473 Scientific, 31415029). ~200 GV oocytes were collected from two mice in parallel, washed 3 times in  
474 PBS with 1x cComplete Protease Inhibitor Cocktail (Merck, 11697498001).

475 Preimplantation embryos were collected after natural mating of control and cKO females with  
476 C57BL/6Bab WT males at E0.5 or E3.5. Implantation was determined by counting the number of  
477 implantation sites in uteri at E6.5 after timed mating. To score postimplantation development,  
478 embryos were collected after natural mating at E8.5 and E12.5. For embryo culture, female mice were  
479 superovulated and embryos dissected in M2 medium at E1.5 after natural mating with WT males.  
480 Fertilized embryos (1-cell and 2-cell stage) were selected for culture in M16 medium (Sigma-Aldrich,  
481 MR-016-D) under mineral oil (Sigma-Aldrich, M8410) at 37°C and 5% CO<sub>2</sub> for 3 days, and  
482 developmental progress recorded each day.

### 483 **Analysis of maturation stage**

484 GV oocytes from 12 week-old females were stained with DAPI and scored according to their  
485 maturation stage. Absence of a ring around the nucleolus was counted as “NSN”, a partial ring as  
486 “intermediate” and a full ring “SN”. Between 116 and 247 oocytes collected from several different  
487 females were analysed per genotype (Number of mice: Control=5, G9a cKO=3, Glp cKO=2, G9a-Glp  
488 cDKO=3).

## 489 **Immunofluorescence analysis**

490 IF was performed after antibody staining as previously described (Santos et al. 2003). Primary  
491 antibodies are listed in **Supplemental Table S5**. MII oocytes were stained with antibodies against  $\alpha$ -  
492 tubulin (spindle), pan-histone (chromatin) and DAPI (heterochromatic DNA). Between 46 and 57 MII  
493 oocytes from 4 to 7 mice were analysed per genotype. For H3K9me1, H3K9me2, H3K9me3, 5-mC and  
494 5-hmC two or three replicate experiments were performed, each with 10-15 oocytes from different  
495 litters, to control for batch effects. Samples were analysed on a Zeiss LSM780 confocal microscope  
496 (63x oil-immersion objective). Spindle conformation and chromosome alignment of MII oocytes was  
497 scored using categories illustrated in **Supplemental Fig. S1C**. For analysis of H3K9me and DNA  
498 methylation Z-stacks of single optical sections were captured and semi-quantification of fluorescence  
499 intensity was performed using Volocity 6.3 (Improvision).

## 500 **LC-MS proteome analysis**

501 Oocytes were lysed in 20 $\mu$ l dissolution buffer containing 100mM triethylammonium bicarbonate  
502 (Sigma, T4708) and 0.1% Sodium Dodecyl Sulfate (SDS), followed by water bath sonication and boiling  
503 at 90°C for 5min. Proteins were reduced with tris-2-carboxyethyl phosphine (TCEP, Sigma) for 1h at  
504 60°C at a final concentration of 5mM, followed by cysteine blocking for 10min at room temperature  
505 using methyl methanethiosulfonate (MMTS, Sigma) at final concentration of 10mM. Samples were  
506 digested overnight at 37°C with trypsin (Pierce #90058) and the next day peptides were labelled with  
507 TMT11plex reagents (0.4mg per sample) according to manufacturer's instructions (Thermo Scientific).  
508 To quench the reaction, 3 $\mu$ l of 5% hydroxylamine (Thermo Scientific) was added for 15min and  
509 samples combined and dried with centrifugal vacuum concentrator. The TMT mix was fractionated  
510 with Reversed-Phase spin columns at high pH (Pierce #84868). Nine fractions were collected using  
511 different elution solutions in the range of 5–50% ACN and were analysed on a Dionex UltiMate 3000  
512 UHPLC system coupled with the nano-ESI Fusion-Lumos (Thermo Scientific) mass spectrometer.  
513 Samples were loaded on the Acclaim PepMap 100, 100 $\mu$ m  $\times$  2cm C18, 5 $\mu$ m, 100Å trapping column

514 with the uPickUp injection method at loading flow rate 5 $\mu$ l/min for 10 min. For peptide separation,  
515 the EASY-Spray analytical column 75 $\mu$ m  $\times$  25cm, C18, 2 $\mu$ m, 100 Å column was used for multi-step  
516 gradient elution. Full scans were performed in the Orbitrap in the range of 380-1500 m/z at 120K  
517 resolution and peptides isolated in the quadrupole with isolation window 1.2Th, HCD collision energy  
518 38% and resolution 50K. Raw data were processed with the SequestHT search engine in Proteome  
519 Discoverer 2.1 software and searched against a Uniprot database containing mouse reviewed entries.  
520 The parameters for the SequestHT node were: Precursor Mass Tolerance 20ppm, Fragment Mass  
521 Tolerance 0.02Da, Dynamic Modifications were Oxidation of M (+15.995Da), Deamidation of N, Q  
522 (+0.984Da) and Static Modifications were TMT6plex at any N-Terminus, K (+229.163Da) and  
523 Methylthio at C (+45.988Da). The consensus workflow included TMT signal-to-noise (S/N) calculation  
524 and the level of confidence for peptide identifications was estimated using the Percolator node with  
525 decoy database search. Strict FDR was set at q-value<0.01. For downstream data analysis, the R  
526 package qPLEXanalyzer was used (Papachristou et al. 2018). The mass spectrometry proteomics data  
527 have been deposited to the ProteomeXchange Consortium via the PRIDE partner repository (Perez-  
528 Riverol et al. 2019) with the dataset identifier PXD030265.

### 529 **Preparation of sequencing libraries**

530 CHIP-seq libraries were prepared using ULI-nCHIP as previously described (Hanna et al. 2018b).  
531 Antibodies were added at 250ng/reaction for both anti-H3K9me2 (mouse monoclonal, Abcam,  
532 ab1220) and anti-IgG (rabbit polyclonal, Diagenode, EB-070-010). Library preparation was completed  
533 with a MicroPlex Library Preparation kit v2 (Diagenode) with Sanger 8-base indices for multiplexing.  
534 Relative enrichment over input was quantified using the library concentrations determined by  
535 Bioanalyzer High Sensitivity DNA Analysis (Agilent). Low input bisulphite (BS)-seq libraries were  
536 prepared by post-bisulphite adapter tagging as previously described (Hanna et al. 2018b). RNA-seq  
537 libraries were prepared as described (Hanna et al. 2019).

### 538 **Sequencing and data processing**

539 Libraries were sequenced on Illumina MiSeq, HiSeq2500 and NextSeq500 systems. ChIP-seq libraries  
540 were sequenced to an average of 57 million paired-end reads of 75 bp read-length (**Supplemental**  
541 **Table S5**). BS-seq libraries were sequenced to an average of 16 million paired-end reads for *G9a* cKO  
542 and 26 million reads for *G9a-Glp* cDKO oocytes of 100-125 bp read-length. RNA-seq libraries were  
543 sequenced to an average single read number of 1.9 million for *G9a* cKO and *G9a-Glp* cDKO oocytes of  
544 50 bp read-length. Raw fastq files were processed with Trim Galore, then mapped to the mouse  
545 GRCm38 genome. Mapping of ChIP-seq data was done using Bowtie2, RNA-seq data by Hisat2 v2.1.0  
546 guided by known splice sites, BS-seq data with Bismark v0.19.0.

#### 547 **Sequencing data analysis**

548 Sequencing data analysis was conducted using SeqMonk  
549 (<https://www.bioinformatics.babraham.ac.uk/projects/seqmonk/>). For ChIP-seq analysis, 10kb  
550 running windows ( $N=272,566$ ) were quantified as reads per kilobase per million (RPKM). Windows  
551 were filtered to exclude mapping artefacts, defined as  $RPKM > 6$  in at least one replicate set of 10%  
552 input libraries ( $N=408$ ). H3K9me2 enrichment was defined as  $\text{Log}_2\text{RPKM} > 2.5$  in d25 GV oocytes  
553 ( $N=34,192$ ). A set of random windows was sampled from all 10kb windows ( $N=35,000$ ). H3K9me2-  
554 enriched and random windows were then merged with adjacent windows within 10kb, resulting in  
555 12,154 H3K9me2-enriched domains and 26,077 random domains. Genic and intergenic regions were  
556 defined as overlapping or not overlapping oocyte transcripts, respectively, and promoters were  
557 defined as  $\pm 500$ bp around transcription start sites of oocyte transcripts (Veselovska et al. 2015). CGIs  
558 were defined as previously described (Illingworth et al. 2008). Oocyte transcription levels were  
559 categorized into not expressed ( $FPKM < 0.1$ ), low expressed ( $FPKM 0.1-1$ ) and high expressed ( $FPKM > 1$ )  
560 using published data (Veselovska et al. 2015).

561 BS-seq data were analysed using a tile-based approach of 100 CpGs for each consecutive genome  
562 window, ensuring equal CpG content in all windows analysed. Methylation values were quantified  
563 using the bisulphite-sequencing pipeline quantification, which calculates per-base methylation

564 percentages and averages these within each window. Filters were applied to ensure a minimum  
565 coverage of  $\geq 10$  observed cytosines per window. Only windows with this minimal coverage in all  
566 samples were taken into account, allowing assessment of 86.2% of 100 CpG windows ( $N=188,433$ ).  
567 Differentially methylated regions (DMRs) were defined by statistical comparison of DNA methylation  
568 levels for each 100 CpG window between control and *G9a* cKO or control and *G9a-Glp* cDKO oocytes  
569 using the EdgeR function in SeqMonk. To assess overlap of DMRs with genomic features, CGI and  
570 oocyte gene annotations were used from (Veselovska et al. 2015). DMRs were merged to form  
571 differentially methylated domains (DMDs). Hierarchical clustering analysis of DMDs was performed in  
572 R using Euclidean distance and Ward's agglomeration method as implemented by the package  
573 pheatmap.

574 For analysis of RNA-seq data, expression of oocyte genes (Veselovska et al. 2015) was quantified using  
575 log transformed read count quantitation per million reads. Differential gene expression was analysed  
576 using DESeq2 followed by filtering of genes with  $\text{Log}_2\text{FC} > 1.5$ . Clustering analysis of DEGs was  
577 performed in R using Euclidean distance and Ward's agglomeration method. Relative enrichment of  
578 differentially abundant proteins amongst DEGs was displayed using the barcode method from the  
579 Limma R package. The ranked list of expression changes only considered genes corresponding to  
580 proteins identified in the proteome. Spearman's rank correlation coefficient between DNA  
581 methylation difference and expression  $\text{log}_2\text{FC}$  was used to interrogate the relationship between DNA  
582 methylation and transcriptional changes.

583 Sequencing data were submitted to the GEO under accession number GSE191026. Publicly available  
584 ChIP-seq and BS-seq data under accessions GSE93941, DRA005849 were used to develop our studies.

### 585 **Statistical analysis**

586 Statistical analysis was conducted in Graphpad Prism, R and VassarStats. SN proportion was compared  
587 using two-way ANOVA (Stage x Genotype) with Šídák's multiple comparisons test. Proportion of  
588 embryo stage at E3.5, number of implantation sites at E6.5 and mean fluorescence intensity of



589 confocal IF images were analysed using one-way ANOVA with Tukey's posthoc test. Litter sizes were  
590 compared using a nested one-way ANOVA with mouse as nested factor. A  $\chi$ -square test was used to  
591 analyse meiosis abnormalities and the frequency of overlap of genic/intergenic regions with DMRs,  
592 histone modifications with DMRs, Uhrf1 hypomethylated regions with DMRs and DEGs with histone  
593 modifications. *P*-value was adjusted using Bonferroni correction to control for multiple comparisons.

594

## 595 **Figure legends**

596 **Figure 1. Developmental potential of *G9a* cKO, *Glp* cKO and *G9a-Glp* cDKO oocytes.**

597 **A)** Representative images showing IF for G9A and GLP in NSN oocytes. Scale bar: 20  $\mu$ m.

598 **B)** Stacked bar chart showing percentage of NSN, intermediate and SN oocytes from mice aged 12  
599 weeks. Number of mice/oocytes: Control=5/247, *G9a* cKO=3/160, *Glp* cKO=2/116, *G9a-Glp*  
600 cDKO=3/188. Ctrl vs. *G9a* cKO: *P*=0.7667; Ctrl vs *Glp* cKO: *P*= 0.0075; Ctrl vs *G9a-Glp* cDKO:  
601 *P*<0.0001; *G9a* cKO vs *G9a-Glp* cDKO *P*=0.0058.

602 **C)** Stacked bar charts showing percentage of chromosome misalignments and spindle abnormalities  
603 in MII oocytes. Examples of normal and abnormal spindles are shown in IF images. The spindle is  
604 stained with an anti- $\alpha$ -tubulin antibody (green) and the chromatin with DAPI (blue) and anti-pan-  
605 histone (red). Number of mice/MII oocytes: Control=5/46, *G9a* cKO=7/57, *Glp* cKO=4/49, *G9a-Glp*  
606 cDKO=6/51.

607 **D)** Stacked bar chart showing developmental stage (%) of embryos from cKO females mated with WT  
608 males and collected on E3.5. Number of mice/embryos: Control=5/30, *G9a* cKO=5/39, *Glp*  
609 cKO=6/35, *G9a-Glp* cDKO=6/29. Blastocysts: Ctrl vs *G9a* cKO *P*=0.9939; Ctrl vs *Glp* cKO *P*=0.0761,  
610 Ctrl vs *G9a-Glp* cDKO *P*=0.0073; One-cell stage: Ctrl vs *G9a-Glp* cDKO *P*=0.0406.

611 **E)** Bar chart showing number of implantation sites scored at E6.5. Dots represent single mice. Ctrl vs  
612 *Glp* cKO *P*=0.0093; Ctrl vs *G9a-Glp* cDKO *P*=0.0020.

613 **F)** Boxplots showing average litter size of females with cKO oocytes mated with WT males. Number  
614 of mice: Control=9, *G9a* cKO=5, *Glp* cKO=3, *G9a-Glp* cDKO=3; Number of litters: Control=60, *G9a*  
615 cKO=26, *Glp* cKO=0, *G9a-Glp* cDKO=0; Ctrl vs *G9a* cKO:  $P=0.0087$ .

616

617 **Figure 2. Analysis of H3K9 methylation in *G9a* cKO, *Glp* cKO and *G9a-Glp* cDKO oocytes.**

618 **A)** Representative IF images of NSN oocytes for H3K9me1, H3K9me2 and H3K9me3 in control, *G9a*  
619 cKO, *Glp* cKO and *G9a-Glp* cDKO oocytes. Scale bar: 20  $\mu$ m.

620 **B)** Boxplots of quantitation of IF images. Dots represent individual oocytes. Analysis is based on 2-5  
621 mice per genotype and 3-4 replicate experiments for each antibody.

622 **C)** Genome screenshot showing H3K9me2 enrichment for 10kb running windows in WT oocytes from  
623 mice aged 15 and 25 days. Y-axis scaling represents  $\log_2$ RPKM centred around  $\log_2$ RPKM=2.5.  
624 Annotation tracks highlight oocyte transcripts, CpG islands, oocyte DNA methylated and  
625 unmethylated domains, and H3K9me2-enriched domains (defined as  $\log_2$ RPKM>2.5 in d25 GV  
626 oocytes).

627 **D)** Boxplots showing relative enrichment over input of H3K9me2 ChIP-seq libraries. Dots represent  
628 individual samples.

629 **E)** Probe trend plot showing loss of H3K9me2-enrichment in *G9a* cKO and *G9a-Glp* cDKO oocytes  
630 compared to WT and control oocytes in H3K9me2-enriched domains but not random domains.

631

632 **Figure 3. Proteome and transcriptome analysis of *G9a* cKO and *G9a-Glp* cDKO oocytes.**

633 **A)** Volcano plot showing differential abundance of proteins in *G9a-Glp* cDKO oocytes compared to  
634 controls. Significantly changing proteins ( $P<0.05$  and  $\text{Log}_2\text{FC}>0.3$ ) are highlighted in dark blue  
635 (decreased abundance) or dark red (increased abundance). Light blue and light red dots indicate  
636 proteins changing significantly in *G9a* cKO oocytes. Proteins changing significantly and with oocyte  
637 function of interest are labelled.

- 638 **B)** Volcano plot showing differential abundance of proteins in *G9a* cKO oocytes compared to  
639 controls. Significantly changing proteins ( $P < 0.05$  and  $\text{Log}_2\text{FC} > 0.3$ ) are highlighted in dark blue  
640 (decreased abundance) or dark red (increased abundance); light blue and light red dots indicate  
641 proteins changing significantly in cDKO oocytes.
- 642 **C)** MA plot showing  $\text{Log}_2$  fold changes in *G9a-Glp* cDKO vs. control oocytes (y-axis) over the mean  
643 expression level (x-axis). Differentially expressed genes (DEGs) are highlighted in blue  
644 (upregulated) and red (downregulated).
- 645 **D)** MA plot showing  $\text{Log}_2$  fold changes in *G9a* cKO vs. control oocytes (y-axis) over the mean  
646 expression level (x-axis). Differentially expressed genes (DEGs) are highlighted in blue  
647 (upregulated) and red (downregulated).
- 648 **E)** Heatmap showing relative expression levels (RPKM) of up- and down-regulated *G9a-Glp* cDKO  
649 DEGs that overlap with *G9a* cKO DEGs.
- 650 **F)** Barchart showing proportion of DEGs overlapping with histone modifications. DEGs are split  
651 according to the clustering analysis of **E**.  $\chi$ -square analysis comparing DEGs to random probes:  
652  $P < 0.0001^{***}$ .
- 653 **G)** Plot showing link between changes in transcript and protein abundance. The x-axis shows  $\text{Log}_2\text{FC}$   
654 (Control vs. *G9a-Glp* cDKO) of genes present in both transcriptome and proteome datasets  
655 ( $N = 2933$ ). Blue and red boxes represent down- and up-regulated transcripts, respectively, with a  
656  $\text{FC} > 1.5$  ( $\text{Log}_2\text{FC} > 0.585$ ). Vertical blue and red lines represent differentially abundant proteins  
657 ( $P < 0.05$  and  $\text{Log}_2\text{FC} > 0.3$ ; ten proteins not detected in the RNA-seq data are not represented).  
658 Enrichment scores, shown above and below, show that downregulated proteins are enriched  
659 among downregulated transcripts and upregulated proteins enriched among upregulated  
660 transcripts (Spearman correlation  $R = 0.43$ ;  $P = 2.2 \times 10^{-9}$ ).

661

662 **Figure 4. DNA methylation changes in *G9a* cKO and *G9a-Glp* cDKO oocytes.**

- 663 **A)** Representative IF images of NSN oocytes showing 5mC and 5hmC in Control, *G9a* cKO, *Glp* cKO  
664 and *G9a-Glp* cDKO oocytes.
- 665 **B)** Boxplots of quantitation of IF images. Dots represent individual oocytes. Analysis is based on 2  
666 mice per genotype and 2 replicate experiments for each antibody.
- 667 **C)** Boxplot showing the methylation difference of *G9a-Glp* cDKO DMRs (hyper and hypo) in controls  
668 vs *G9a* cKO and controls vs *G9a-Glp* cDKO oocytes.
- 669 **D)** Genome screenshot showing example of a region uniquely hypomethylated in *G9a-Glp* cDKO  
670 oocytes spanning the *Arhgef10l* transcript. Annotation tracks show position of H3K9me2-enriched  
671 domains and oocyte transcripts.
- 672 **E)** Heatmap showing clustering analysis of *G9a-Glp* cDKO hypo- and hypermethylated domains.
- 673 **F)** Barchart showing percentage overlap of DMRs and random probes with H3K9me2, H3K37me3  
674 and H3K4me3. H3K9me2: *G9a* cKO hyper *adj. P*=0.0136, *G9a* cKO hypo *P*<0.0001, *G9a-Glp* cDKO  
675 hypo *P*<0.0001; H3K27me3: *G9a* cKO hyper *P*<0.0001, *G9a-Glp* cDKO hyper *P*<0.0001; H3K4me3:  
676 all genotypes *P*<0.0001.
- 677 **G)** Plot showing correlation between methylation changes (% methylation difference) and expression  
678 changes (Log<sub>2</sub>FC) of DEGs in *G9a-Glp* cDKO oocytes. Relative expression levels (RPKM) of each  
679 gene are indicated by the colour scale. Spearman correlation is shown.
- 680 **H)** Barchart showing percentage overlap of DMRs with 100-CpG windows that are hypomethylated  
681 in *Uhrf1* cKO oocytes (>20% methylation difference, (Maenohara et al. 2017)), random 100-CpG  
682 windows and 100-CpG windows that are highly methylated (>75%) in WT and *Uhrf1* cKO oocytes.  
683 *G9a* cKO hyper *adj. P*=0.0404, *G9a-Glp* cDKO hyper, *G9a* cKO hypo and *G9a-Glp* cDKO hyper  
684 *P*<0.0001.

685

686 **Figure 5. Summary of the developmental and molecular phenotypes of *G9a* cKO, *Glp* cKO and *G9a-***  
687 ***Glp* cDKO oocytes demonstrating the distinct roles of GLP and G9A in the oocyte.**

688

## 689 **Competing interest statement**

690 The authors declare no competing interests.

691

## 692 **Acknowledgements**

693 We would like to Kristina Tabbada and Nicole Forrester of the Sequencing, Simon Walker of the  
694 Imaging, Simon Andrews and Felix Krueger of the Bioinformatics facilities, and members of the  
695 Biological Support Unit at the Babraham Institute for excellent support. Work in G.K.'s lab was funded  
696 by the UK Biotechnology and Biological Sciences Research Council (BBS/E/B/000C0423) and Medical  
697 Research Council (MR/K011332/1, MR/S000437/1); H.D. was supported by a Fondecyt Postdoctorado  
698 fellowship (3200676); C.H. was supported by a Next Generation Fellowship from the Centre for  
699 Trophoblast Research. Part of the work in C.D'S.'s lab was funded by CRUK core grant (A29580)  
700 awarded to the Cambridge Institute.

701 **Author contributions:** C.H., H.D. and G.K. conceptualised the study. H.D., F.S., E.K.P. and C.H. collected  
702 the data. H.D., C.H., J.C-F., and K.K. performed data analysis. H.D., C.H. and J.C-F. generated  
703 manuscript figures. H.D. drafted the manuscript, with input from C.H., J.C.-F., E.K.P., C.D'S. and G.K.

704

## 705 **References**

- 706 Andreu-Vieyra CV, Chen R, Agno JE, Glaser S, Anastassiadis K, Stewart AF, Matzuk MM. 2010. MLL2 is  
707 required in oocytes for bulk histone 3 lysine 4 trimethylation and transcriptional silencing.  
708 *PLoS Biol* **8**.
- 709 Au Yeung WK, Brind'Amour J, Hatano Y, Yamagata K, Feil R, Lorincz MC, Tachibana M, Shinkai Y,  
710 Sasaki H. 2019. Histone H3K9 Methyltransferase G9a in Oocytes Is Essential for  
711 Preimplantation Development but Dispensable for CG Methylation Protection. *Cell reports*  
712 **27**: 282-293 e284.
- 713 Auclair G, Borgel J, Sanz LA, Vallet J, Guibert S, Dumas M, Cavellier P, Girardot M, Forne T, Feil R et al.  
714 2016. EHMT2 directs DNA methylation for efficient gene silencing in mouse embryos.  
715 *Genome Res* **26**: 192-202.

- 716 Bittencourt D, Lee BH, Gao L, Gerke DS, Stallcup MR. 2014. Role of distinct surfaces of the G9a  
717 ankyrin repeat domain in histone and DNA methylation during embryonic stem cell self-  
718 renewal and differentiation. *Epigenetics Chromatin* **7**: 27.
- 719 Chang Y, Sun L, Kokura K, Horton JR, Fukuda M, Espejo A, Izumi V, Koomen JM, Bedford MT, Zhang X  
720 et al. 2011. MPP8 mediates the interactions between DNA methyltransferase Dnmt3a and  
721 H3K9 methyltransferase GLP/G9a. *Nat Commun* **2**: 533.
- 722 Collins RE, Northrop JP, Horton JR, Lee DY, Zhang X, Stallcup MR, Cheng X. 2008. The ankyrin repeats  
723 of G9a and GLP histone methyltransferases are mono- and dimethyllysine binding modules.  
724 *Nat Struct Mol Biol* **15**: 245-250.
- 725 Dong KB, Maksakova IA, Mohn F, Leung D, Appanah R, Lee S, Yang HW, Lam LL, Mager DL, Schubeler  
726 D et al. 2008. DNA methylation in ES cells requires the lysine methyltransferase G9a but not  
727 its catalytic activity. *EMBO J* **27**: 2691-2701.
- 728 Eymery A, Liu Z, Ozonov EA, Stadler MB, Peters AH. 2016. The methyltransferase Setdb1 is essential  
729 for meiosis and mitosis in mouse oocytes and early embryos. *Development*  
730 doi:10.1242/dev.132746.
- 731 Ferry L, Fournier A, Tsusaka T, Adelmant G, Shimazu T, Matano S, Kirsh O, Amouroux R, Dohmae N,  
732 Suzuki T et al. 2017. Methylation of DNA Ligase 1 by G9a/GLP Recruits UHRF1 to Replicating  
733 DNA and Regulates DNA Methylation. *Mol Cell* **67**: 550-565 e555.
- 734 Guibert S, Forne T, Weber M. 2012. Global profiling of DNA methylation erasure in mouse primordial  
735 germ cells. *Genome Res* **22**: 633-641.
- 736 Hanna CW, Demond H, Kelsey G. 2018a. Epigenetic regulation in development: is the mouse a good  
737 model for the human? *Hum Reprod Update* **24**: 556-576.
- 738 Hanna CW, Perez-Palacios R, Gahurova L, Schubert M, Krueger F, Biggins L, Andrews S, Colome-  
739 Tatche M, Bourc'his D, Dean W et al. 2019. Endogenous retroviral insertions drive non-  
740 canonical imprinting in extra-embryonic tissues. *Genome biology* **20**: 225.
- 741 Hanna CW, Taudt A, Huang J, Gahurova L, Kranz A, Andrews S, Dean W, Stewart AF, Colome-Tatche  
742 M, Kelsey G. 2018b. MLL2 conveys transcription-independent H3K4 trimethylation in  
743 oocytes. *Nat Struct Mol Biol* **25**: 73-82.
- 744 Illingworth R, Kerr A, Desousa D, Jorgensen H, Ellis P, Stalker J, Jackson D, Clee C, Plumb R, Rogers J  
745 et al. 2008. A novel CpG island set identifies tissue-specific methylation at developmental  
746 gene loci. *PLoS Biol* **6**: e22.
- 747 Jiang Q, Ang JYJ, Lee AY, Cao Q, Li KY, Yip KY, Leung DCY. 2020. G9a Plays Distinct Roles in  
748 Maintaining DNA Methylation, Retrotransposon Silencing, and Chromatin Looping. *Cell*  
749 *reports* **33**: 108315.
- 750 Kaneda M, Okano M, Hata K, Sado T, Tsujimoto N, Li E, Sasaki H. 2004. Essential role for de novo  
751 DNA methyltransferase Dnmt3a in paternal and maternal imprinting. *Nature* **429**: 900-903.
- 752 Kim J, Zhao H, Dan J, Kim S, Hardikar S, Hollowell D, Lin K, Lu Y, Takata Y, Shen J et al. 2016. Maternal  
753 Setdb1 Is Required for Meiotic Progression and Preimplantation Development in Mouse.  
754 *PLoS Genet* **12**: e1005970.
- 755 Kim JK, Esteve PO, Jacobsen SE, Pradhan S. 2009. UHRF1 binds G9a and participates in p21  
756 transcriptional regulation in mammalian cells. *Nucleic Acids Res* **37**: 493-505.
- 757 Kobayashi H, Sakurai T, Imai M, Takahashi N, Fukuda A, Yayoi O, Sato S, Nakabayashi K, Hata K,  
758 Sotomaru Y et al. 2012. Contribution of intragenic DNA methylation in mouse gametic DNA  
759 methylomes to establish oocyte-specific heritable marks. *PLoS Genet* **8**: e1002440.
- 760 Lan ZJ, Xu X, Cooney AJ. 2004. Differential oocyte-specific expression of Cre recombinase activity in  
761 GDF-9-iCre, Zp3cre, and Msx2Cre transgenic mice. *Biol Reprod* **71**: 1469-1474.
- 762 Maenohara S, Unoki M, Toh H, Ohishi H, Sharif J, Koseki H, Sasaki H. 2017. Role of UHRF1 in de novo  
763 DNA methylation in oocytes and maintenance methylation in preimplantation embryos.  
764 *PLoS Genet* **13**: e1007042.

- 765 Meng TG, Zhou Q, Ma XS, Liu XY, Meng QR, Huang XJ, Liu HL, Lei WL, Zhao ZH, Ouyang YC et al. 2020.  
766 PRC2 and EHMT1 regulate H3K27me2 and H3K27me3 establishment across the zygote  
767 genome. *Nat Commun* **11**: 6354.
- 768 Papachristou EK, Kishore K, Holding AN, Harvey K, Roumeliotis TI, Chilamakuri CSR, Omarjee S, Chia  
769 KM, Swarbrick A, Lim E et al. 2018. A quantitative mass spectrometry-based approach to  
770 monitor the dynamics of endogenous chromatin-associated protein complexes. *Nat*  
771 *Commun* **9**: 2311.
- 772 Perez-Riverol Y, Csordas A, Bai J, Bernal-Llinares M, Hewapathirana S, Kundu DJ, Inuganti A, Griss J,  
773 Mayer G, Eisenacher M et al. 2019. The PRIDE database and related tools and resources in  
774 2019: improving support for quantification data. *Nucleic Acids Res* **47**: D442-D450.
- 775 Peters AH, Kubicek S, Mechtler K, O'Sullivan RJ, Derijck AA, Perez-Burgos L, Kohlmaier A, Opravil S,  
776 Tachibana M, Shinkai Y et al. 2003. Partitioning and plasticity of repressive histone  
777 methylation states in mammalian chromatin. *Mol Cell* **12**: 1577-1589.
- 778 Pinheiro I, Margueron R, Shukeir N, Eisold M, Fritsch C, Richter FM, Mittler G, Genoud C, Goyama S,  
779 Kurokawa M et al. 2012. Prdm3 and Prdm16 are H3K9me1 methyltransferases required for  
780 mammalian heterochromatin integrity. *Cell* **150**: 948-960.
- 781 Rathert P, Dhayalan A, Murakami M, Zhang X, Tamas R, Jurkowska R, Komatsu Y, Shinkai Y, Cheng X,  
782 Jeltsch A. 2008. Protein lysine methyltransferase G9a acts on non-histone targets. *Nat Chem*  
783 *Biol* **4**: 344-346.
- 784 Rice JC, Briggs SD, Ueberheide B, Barber CM, Shabanowitz J, Hunt DF, Shinkai Y, Allis CD. 2003.  
785 Histone methyltransferases direct different degrees of methylation to define distinct  
786 chromatin domains. *Mol Cell* **12**: 1591-1598.
- 787 Rothbart SB, Dickson BM, Ong MS, Krajewski K, Houliston S, Kireev DB, Arrowsmith CH, Strahl BD.  
788 2013. Multivalent histone engagement by the linked tandem Tudor and PHD domains of  
789 UHRF1 is required for the epigenetic inheritance of DNA methylation. *Genes Dev* **27**: 1288-  
790 1298.
- 791 Rothbart SB, Krajewski K, Nady N, Tempel W, Xue S, Badeaux AI, Barsyte-Lovejoy D, Martinez JY,  
792 Bedford MT, Fuchs SM et al. 2012. Association of UHRF1 with methylated H3K9 directs the  
793 maintenance of DNA methylation. *Nat Struct Mol Biol* **19**: 1155-1160.
- 794 Sampath SC, Marazzi I, Yap KL, Sampath SC, Krutchinsky AN, Mecklenbrauker I, Viale A, Rudensky E,  
795 Zhou MM, Chait BT et al. 2007. Methylation of a histone mimic within the histone  
796 methyltransferase G9a regulates protein complex assembly. *Mol Cell* **27**: 596-608.
- 797 Santos F, Peat J, Burgess H, Rada C, Reik W, Dean W. 2013. Active demethylation in mouse zygotes  
798 involves cytosine deamination and base excision repair. *Epigenetics Chromatin* **6**: 39.
- 799 Santos F, Zakhartchenko V, Stojkovic M, Peters A, Jenuwein T, Wolf E, Reik W, Dean W. 2003.  
800 Epigenetic marking correlates with developmental potential in cloned bovine  
801 preimplantation embryos. *Current biology : CB* **13**: 1116-1121.
- 802 Schaefer A, Sampath SC, Intrator A, Min A, Gertler TS, Surmeier DJ, Tarakhovskiy A, Greengard P.  
803 2009. Control of cognition and adaptive behavior by the GLP/G9a epigenetic suppressor  
804 complex. *Neuron* **64**: 678-691.
- 805 Scheer S, Zaph C. 2017. The Lysine Methyltransferase G9a in Immune Cell Differentiation and  
806 Function. *Front Immunol* **8**: 429.
- 807 Seisenberger S, Andrews S, Krueger F, Arand J, Walter J, Santos F, Popp C, Thienpont B, Dean W, Reik  
808 W. 2012. The dynamics of genome-wide DNA methylation reprogramming in mouse  
809 primordial germ cells. *Mol Cell* **48**: 849-862.
- 810 Seki Y, Hayashi K, Itoh K, Mizugaki M, Saitou M, Matsui Y. 2005. Extensive and orderly  
811 reprogramming of genome-wide chromatin modifications associated with specification and  
812 early development of germ cells in mice. *Dev Biol* **278**: 440-458.
- 813 Shinkai Y, Tachibana M. 2011. H3K9 methyltransferase G9a and the related molecule GLP. *Genes Dev*  
814 **25**: 781-788.

- 815 Shirane K, Toh H, Kobayashi H, Miura F, Chiba H, Ito T, Kono T, Sasaki H. 2013. Mouse oocyte  
816 methylomes at base resolution reveal genome-wide accumulation of non-CpG methylation  
817 and role of DNA methyltransferases. *PLoS Genet* **9**: e1003439.
- 818 Tachibana M, Matsumura Y, Fukuda M, Kimura H, Shinkai Y. 2008. G9a/GLP complexes  
819 independently mediate H3K9 and DNA methylation to silence transcription. *EMBO J* **27**:  
820 2681-2690.
- 821 Tachibana M, Sugimoto K, Fukushima T, Shinkai Y. 2001. Set domain-containing protein, G9a, is a  
822 novel lysine-preferring mammalian histone methyltransferase with hyperactivity and specific  
823 selectivity to lysines 9 and 27 of histone H3. *J Biol Chem* **276**: 25309-25317.
- 824 Tachibana M, Sugimoto K, Nozaki M, Ueda J, Ohta T, Ohki M, Fukuda M, Takeda N, Niida H, Kato H et  
825 al. 2002. G9a histone methyltransferase plays a dominant role in euchromatic histone H3  
826 lysine 9 methylation and is essential for early embryogenesis. *Genes Dev* **16**: 1779-1791.
- 827 Tachibana M, Ueda J, Fukuda M, Takeda N, Ohta T, Iwanari H, Sakihama T, Kodama T, Hamakubo T,  
828 Shinkai Y. 2005. Histone methyltransferases G9a and GLP form heteromeric complexes and  
829 are both crucial for methylation of euchromatin at H3-K9. *Genes Dev* **19**: 815-826.
- 830 Veselovska L, Smallwood SA, Saadeh H, Stewart KR, Krueger F, Maupetit-Mehouas S, Arnaud P,  
831 Tomizawa S, Andrews S, Kelsey G. 2015. Deep sequencing and de novo assembly of the  
832 mouse oocyte transcriptome define the contribution of transcription to the DNA  
833 methylation landscape. *Genome biology* **16**: 209.
- 834 Xu Q, Xiang Y, Wang Q, Wang L, Brind'Amour J, Bogutz AB, Zhang Y, Zhang B, Yu G, Xia W et al. 2019.  
835 SETD2 regulates the maternal epigenome, genomic imprinting and embryonic development.  
836 *Nat Genet* **51**: 844-856.
- 837 Zeng TB, Han L, Pierce N, Pfeifer GP, Szabo PE. 2019. EHMT2 and SETDB1 protect the maternal  
838 pronucleus from 5mC oxidation. *Proc Natl Acad Sci U S A* **116**: 10834-10841.
- 839 Zuccotti M, Garagna S, Merico V, Monti M, Alberto Redi C. 2005. Chromatin organisation and nuclear  
840 architecture in growing mouse oocytes. *Mol Cell Endocrinol* **234**: 11-17.
- 841
- 842



843 **Figure 1**

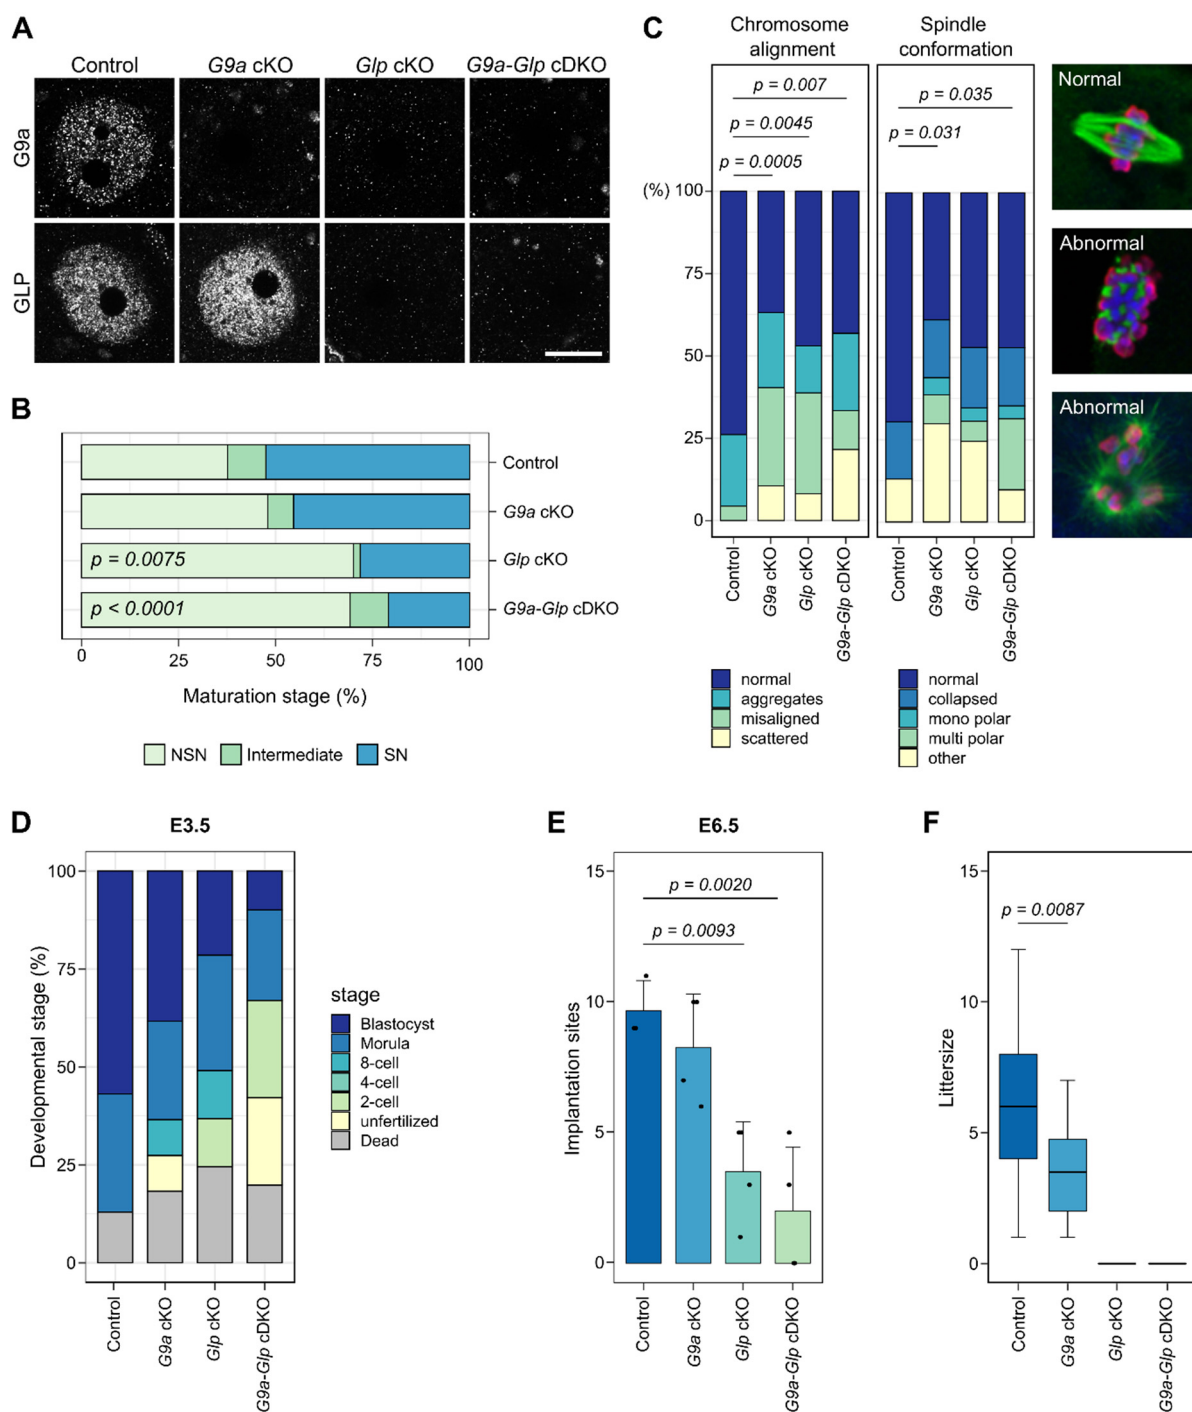

844

845 **Figure 2**

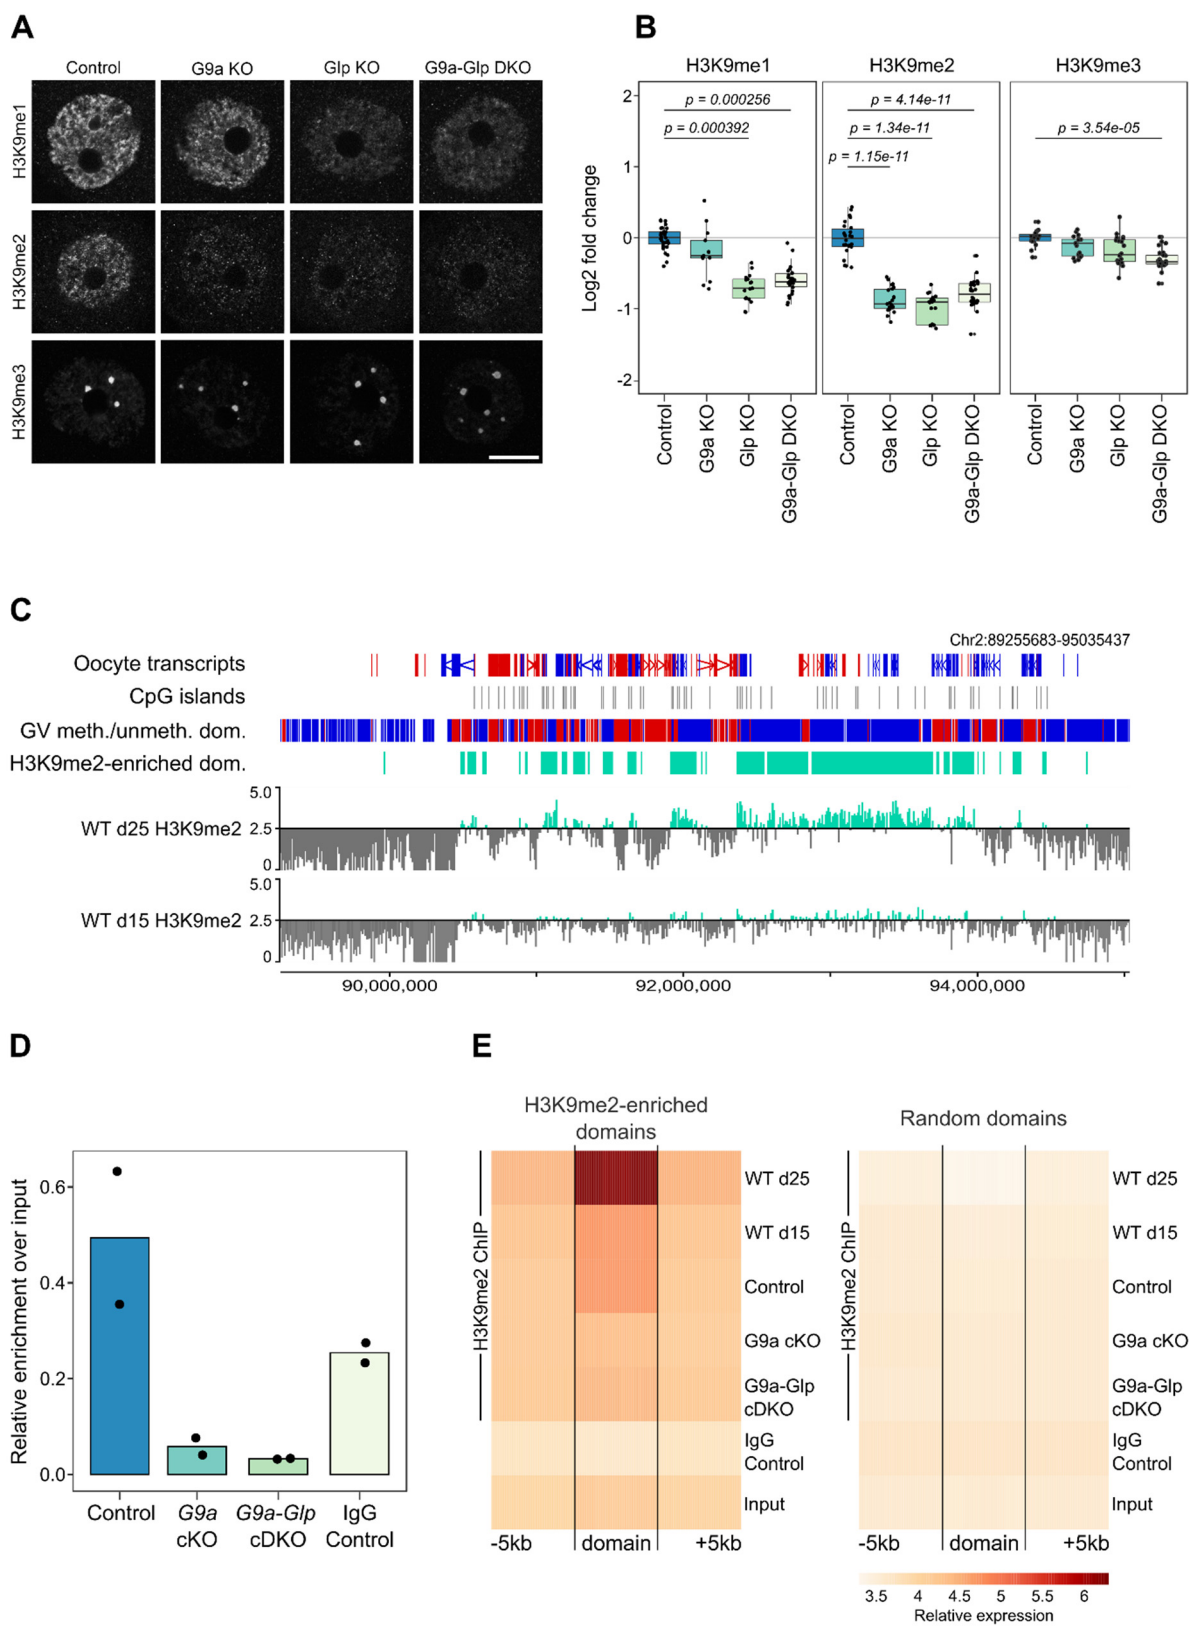

846

847 **Figure 3**

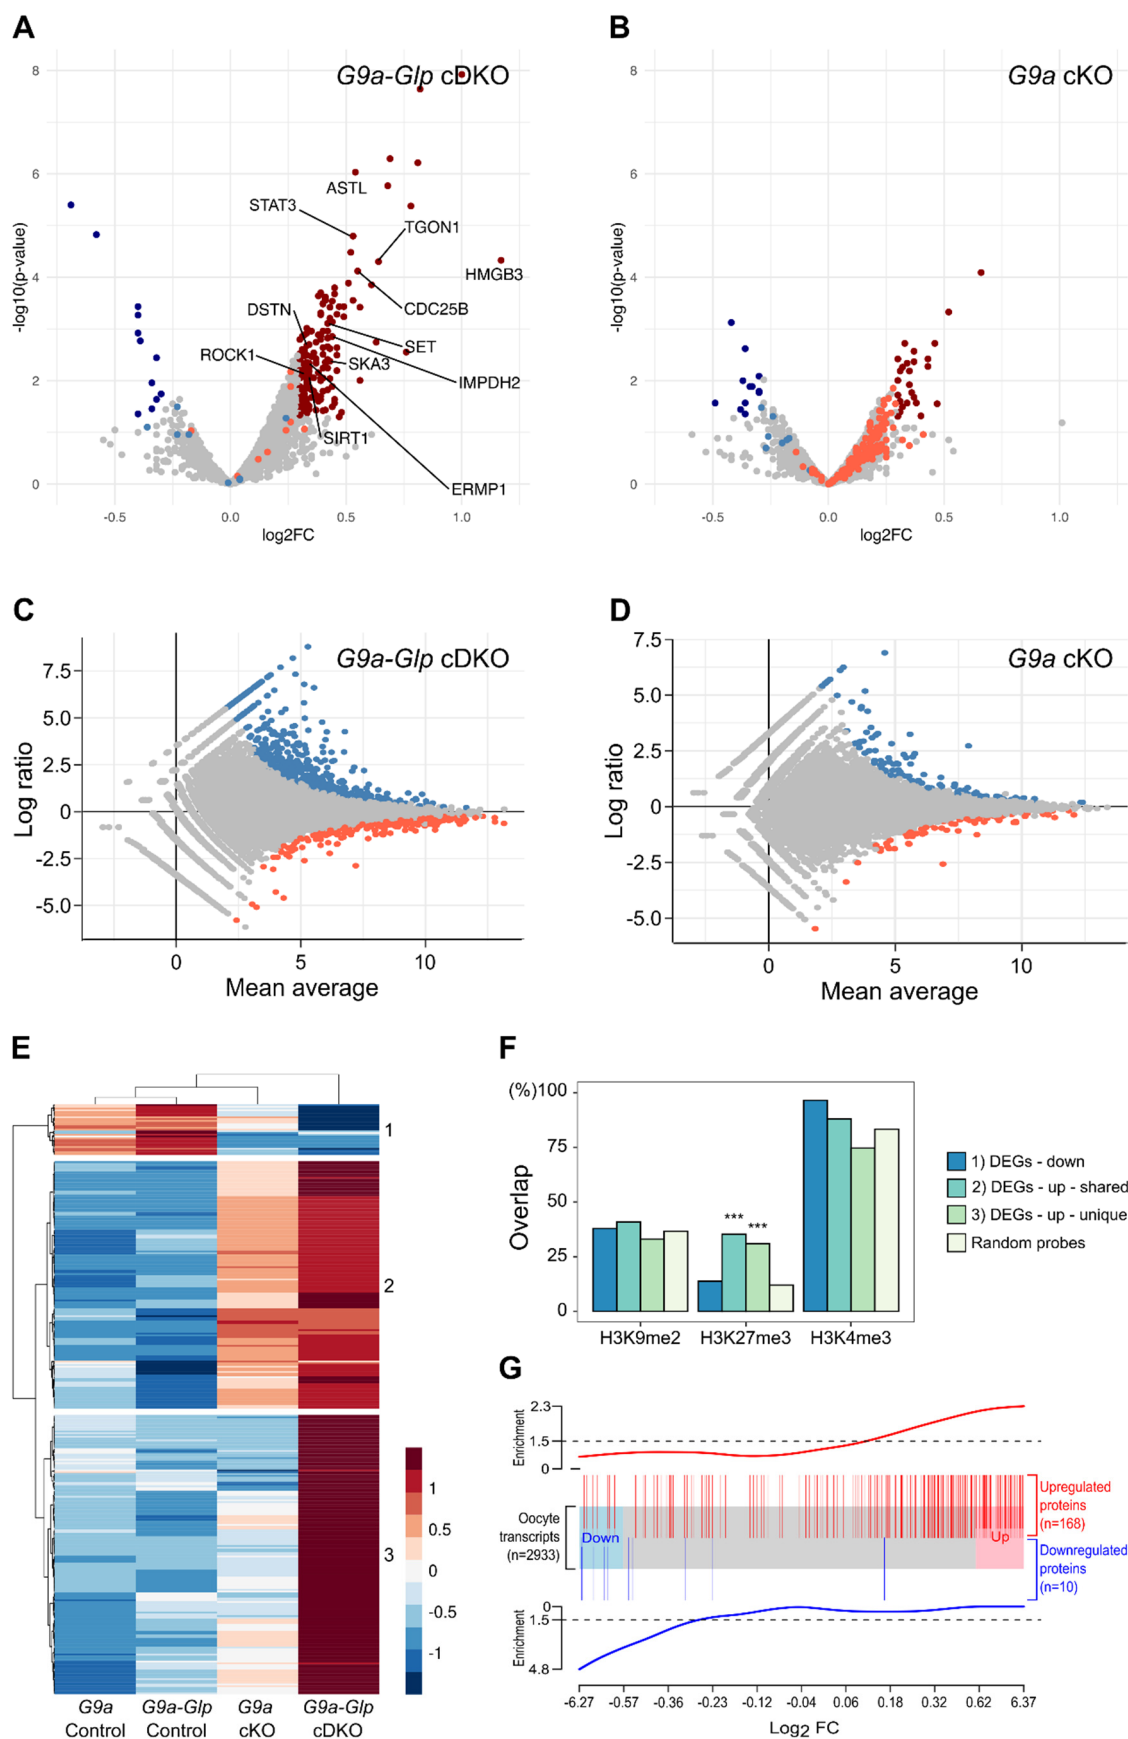

848

849 **Figure 4**

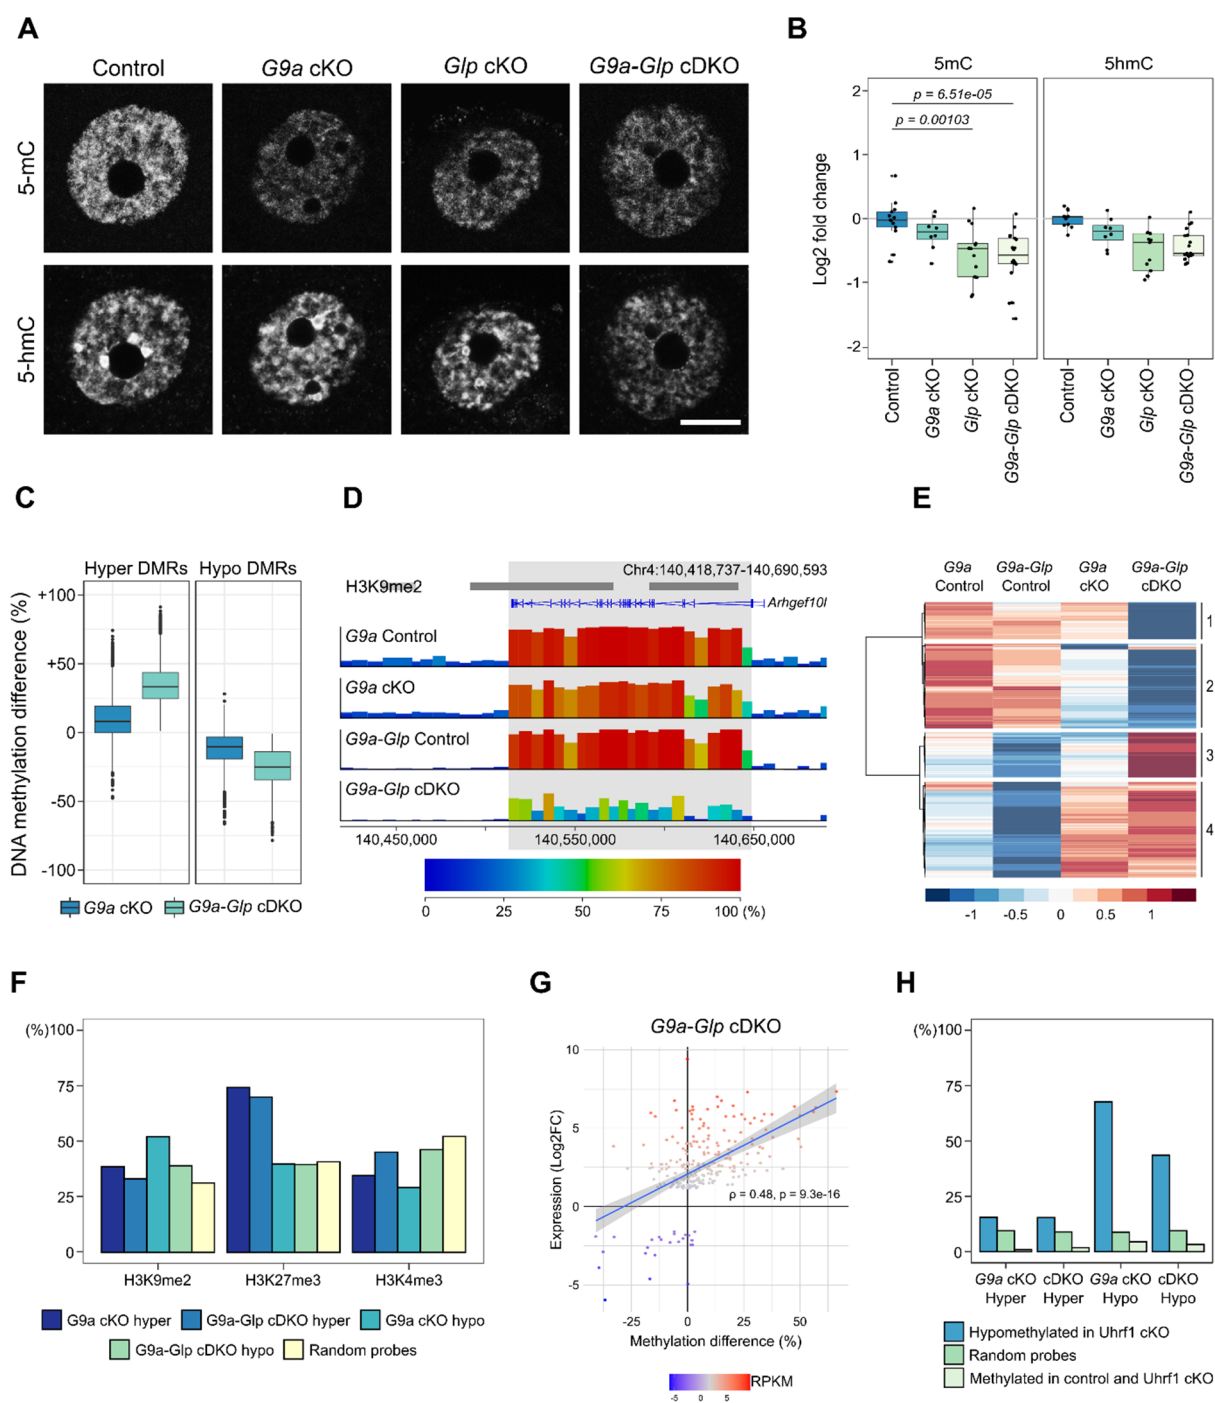

850

851 **Figure 5**

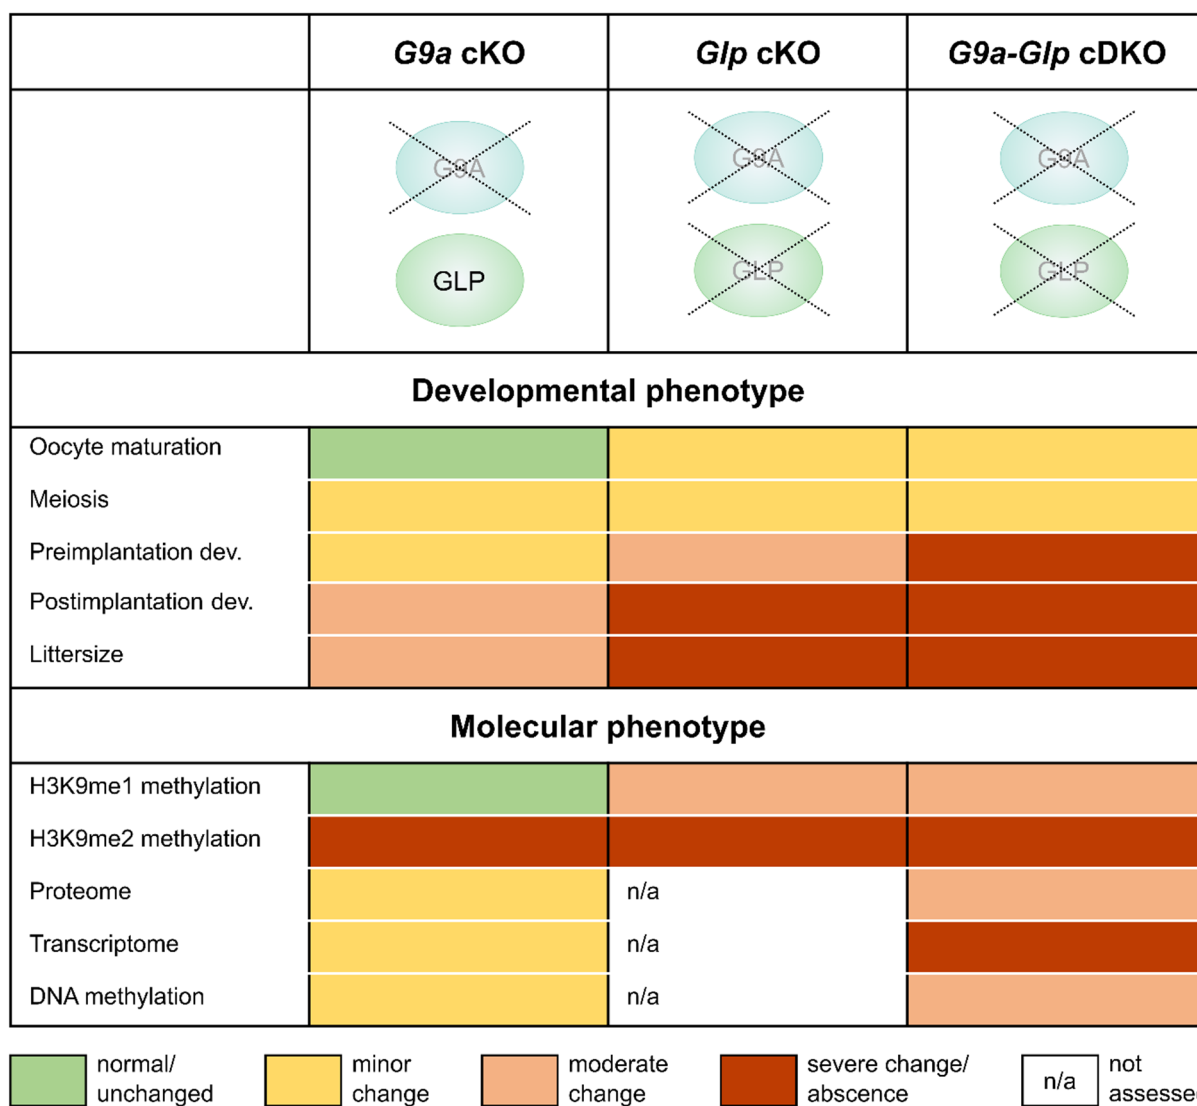

## Supplementary Figures

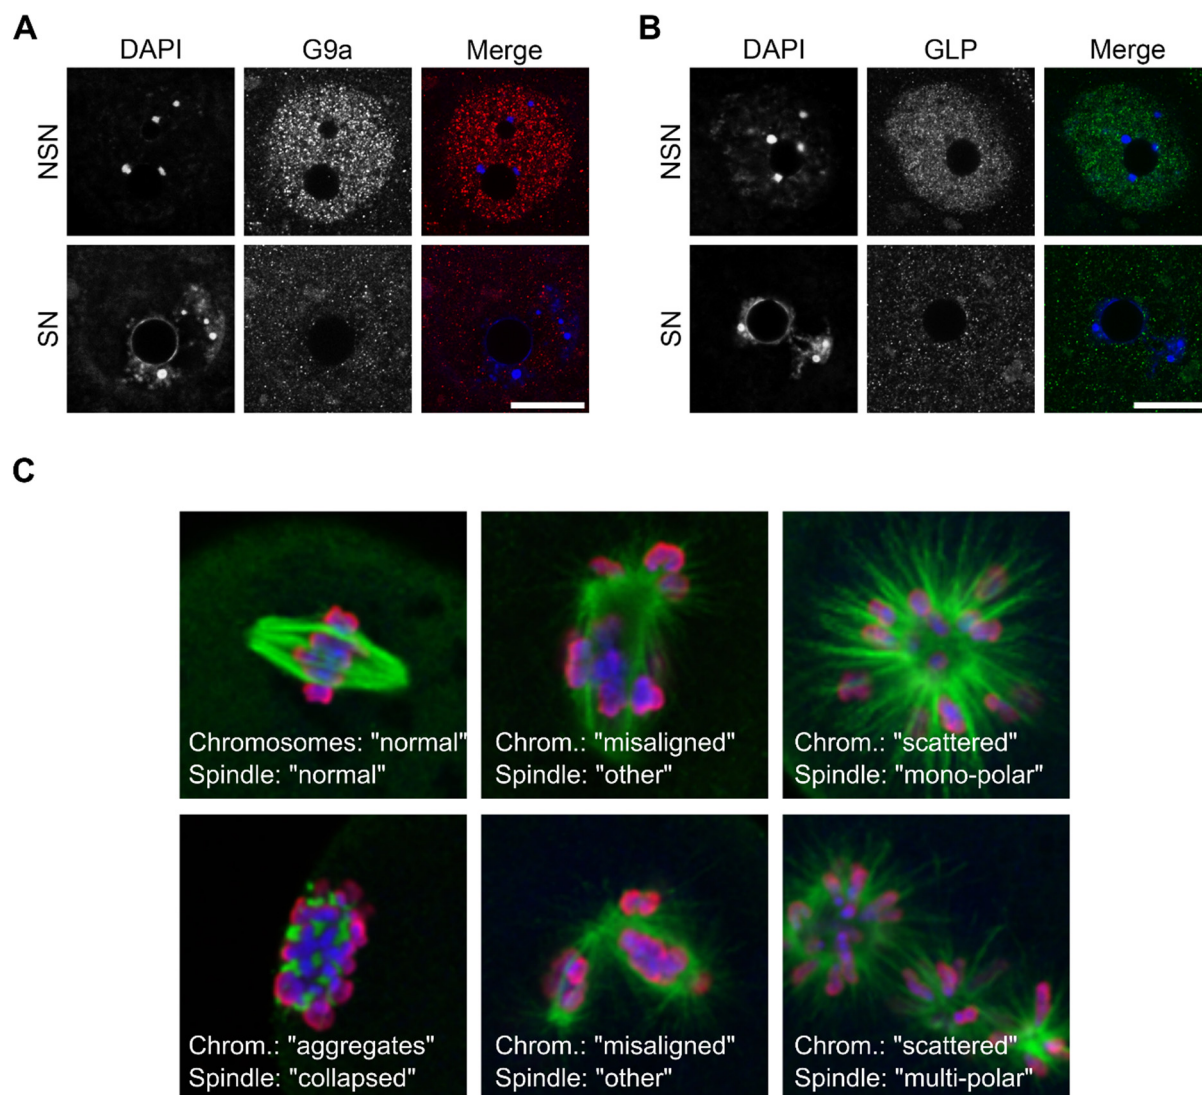

**Figure S1: G9A and GLP expression in the oocyte and their effects on meiosis**

**A, B)** Representative images showing DNA stained with DAPI, and G9A expression (**A**) and GLP expression (**B**) revealed by IF in NSN and SN control oocytes. The scale bar represents 20 $\mu$ m. **C)** Example images showing meiotic abnormalities observed in MII oocytes. The spindle is stained with an anti- $\alpha$ -tubulin antibody (green) and the chromatin with DAPI (blue) and anti-pan-histone (red).

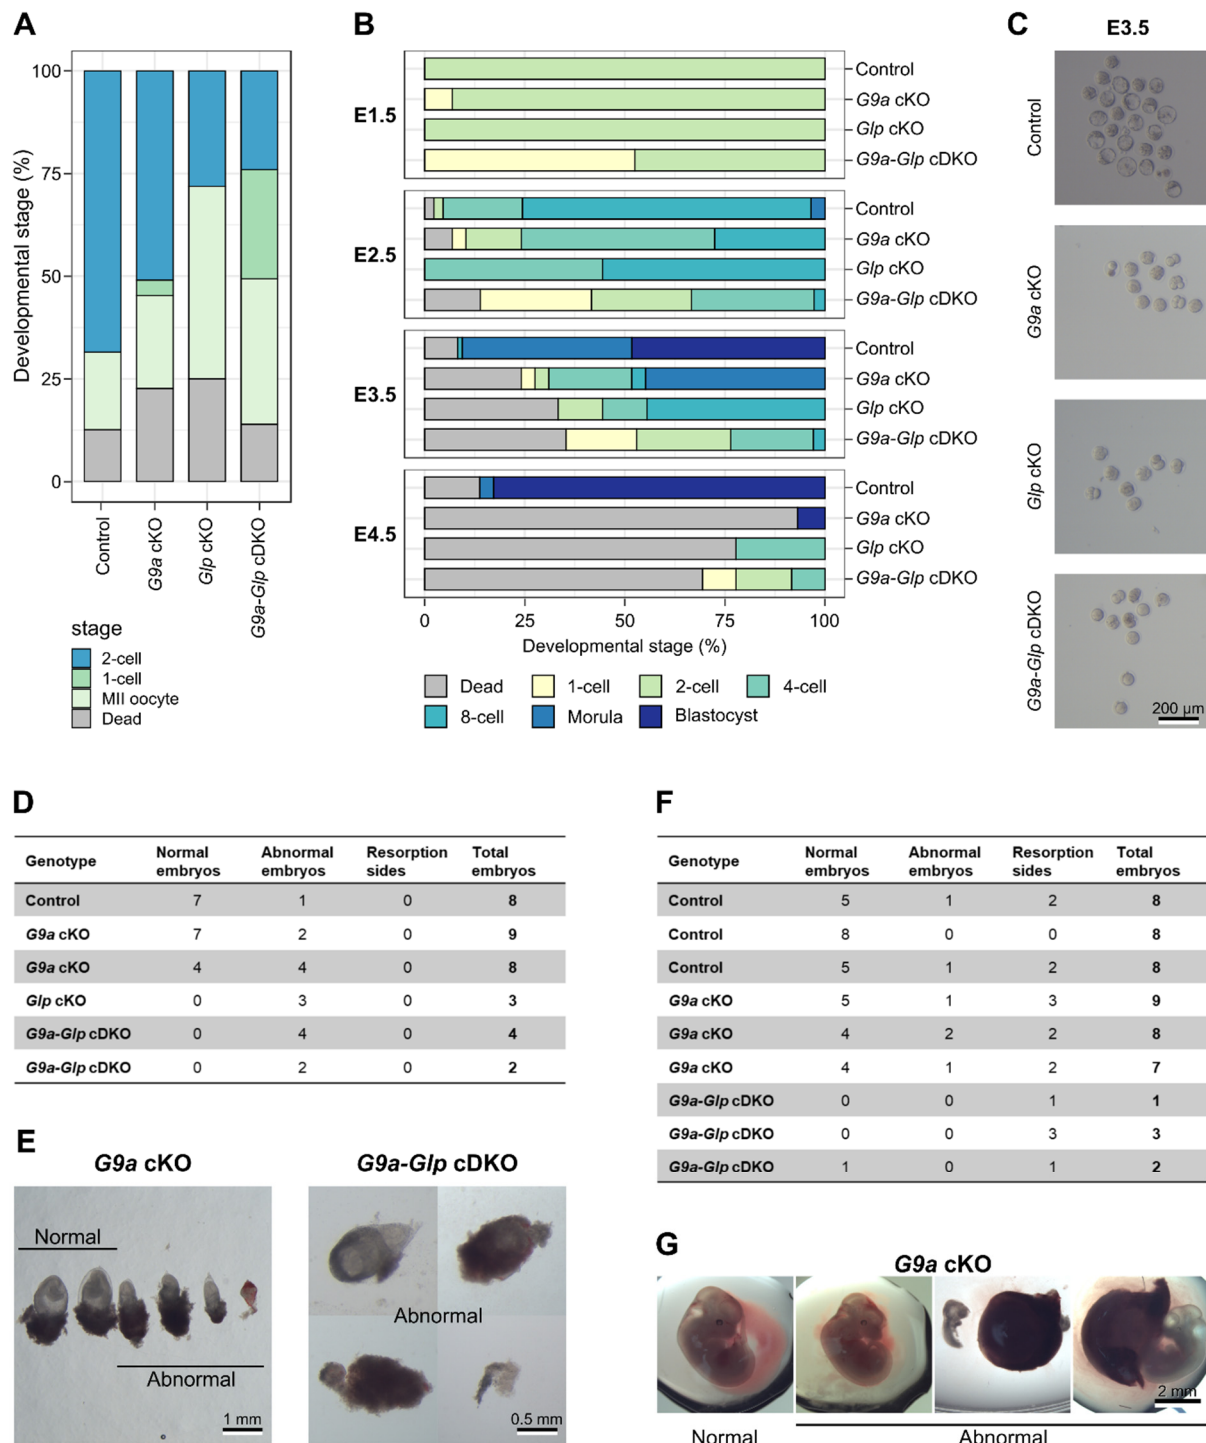

**Figure S2: *In vitro* preimplantation and *in vivo* postimplantation development of embryos lacking maternal G9A and/or GLP.**

**A)** Stacked bar chart showing developmental stage of embryos collected at E1.5 after superovulation and natural mating with C57Bl6/BabR WT males. . One-way ANOVA with Tukey's posthoc test: 2-cell stage Control vs G9a-Glp cDKO  $P = 0.0068^{**}$ . **B)** Stacked bar charts showing developmental stage of embryos cultured *in vitro* after natural mating on E1.5, E2.5, E3.5 and E4.5. Number of litters/total number embryos: Control = 3/86, G9a cKO = 3/29, Glp cKO = 1/9, G9a-Glp cDKO = 4/40. One-way ANOVA with Tukey's posthoc test: morula stage Control vs G9a cKO  $P = 0.0006^{***}$ . **C)** Images showing examples of embryos cultured *in vitro* on E3.5. **D, E)** Table showing embryo development at E8.5 (**D**)

and E12.5 **(E)** after natural mating of conditional KO females with WT males. Each line represents one female mouse. Indicated are the number of normal embryos, abnormal embryos and resorption sites for each female.



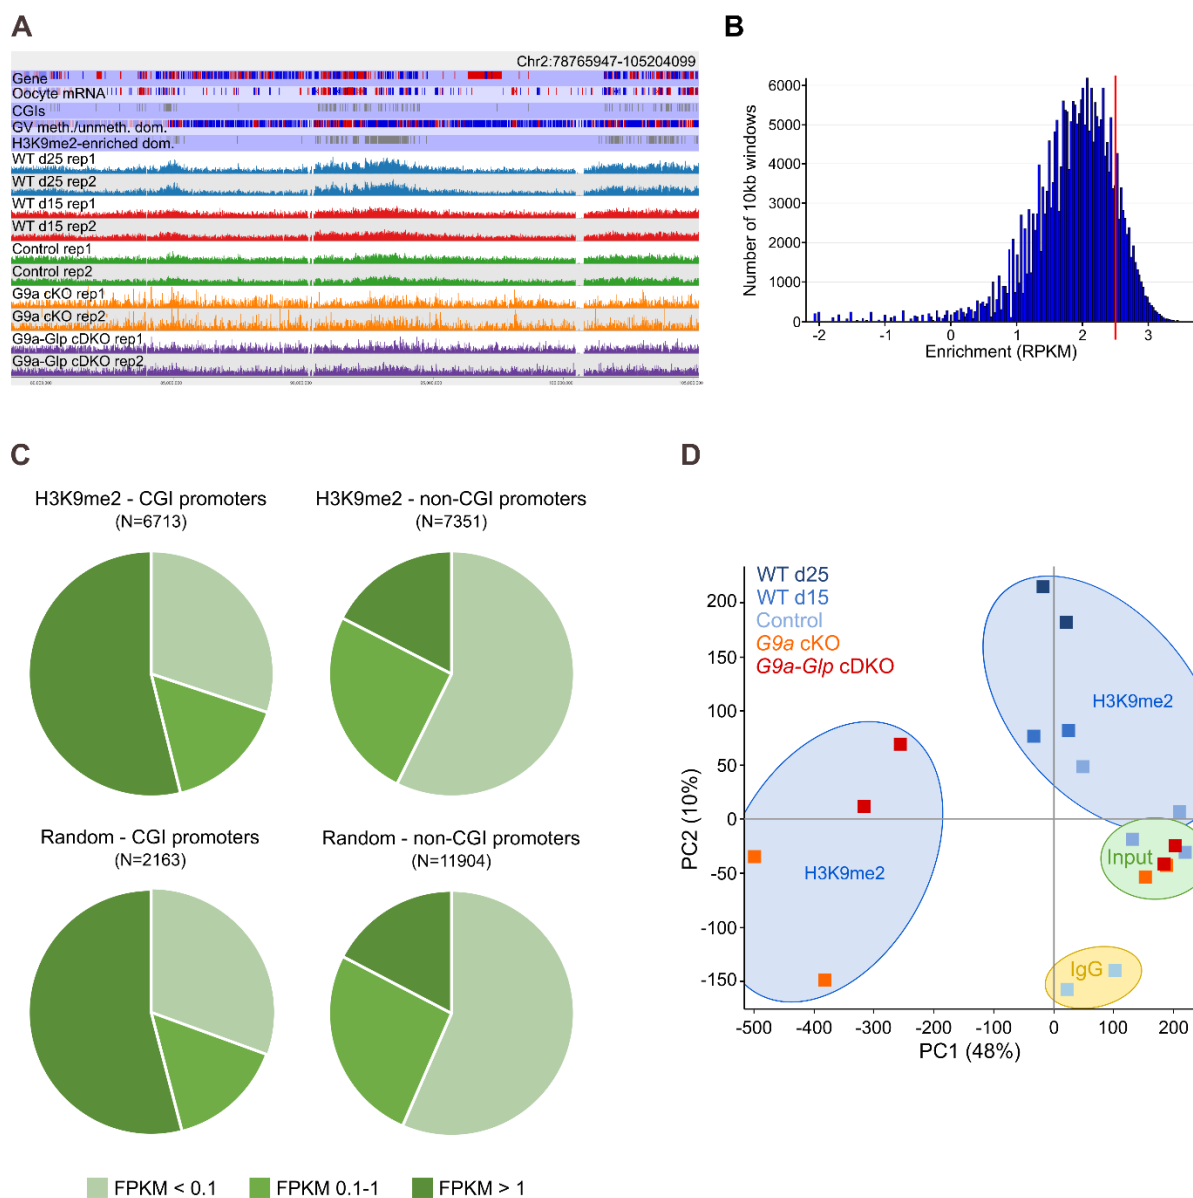

**Figure S3: CHIP-seq analysis showing H3K9me2 distribution in control, *G9a* cKO and *G9a-Glp* cDKO oocytes.**

**A)** Screenshot showing H3K9me2 enrichment and reproducibility of replicates. **B)** Histogram showing number of 10 kb windows with a certain enrichment level in d25 WT oocytes. The red line indicates the threshold set to define H3K9me2 enrichment (RPKM > 2.5). **C)** Pie charts showing overlap of H3K9me2 enriched and random probes with untranscribed (FPKM < 0.1), lowly transcribed (FPKM 0.1-1) and highly transcribed genes (FPKM > 1). **D)** PCA plot of H3K9me2 (blue shading), input (green shading) and IgG (yellow shading) ChIP-seq libraries, comparing WT (d15 and d25), control, *G9a* cKO and *G9a-Glp* cDKO samples.

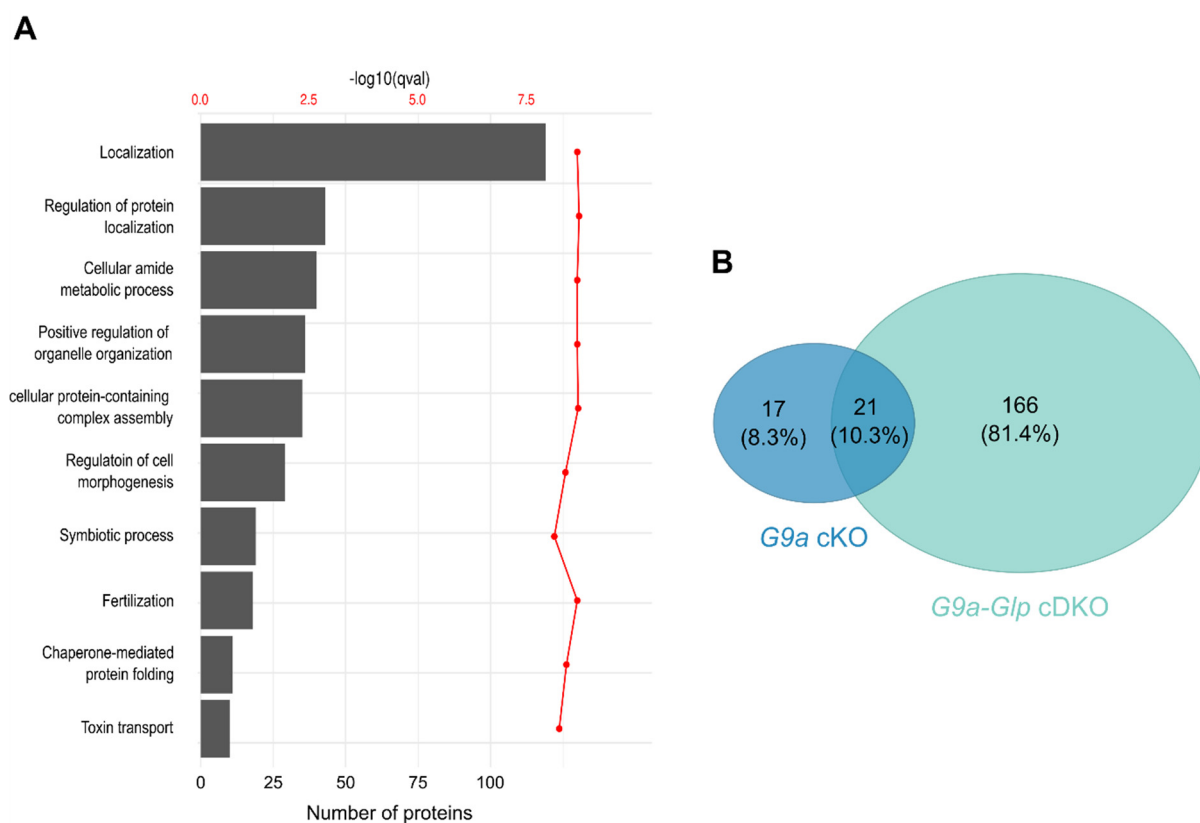

**Figure S4: Proteome and transcriptome analysis of *G9a* cKO and *G9a-Glp* cDKO oocytes with corresponding littermate controls.**

**A)** GO analysis of the oocyte proteome. **B)** Venn diagram of significant changing proteins in *G9a* cKO and *G9a-Glp* cDKO oocytes.

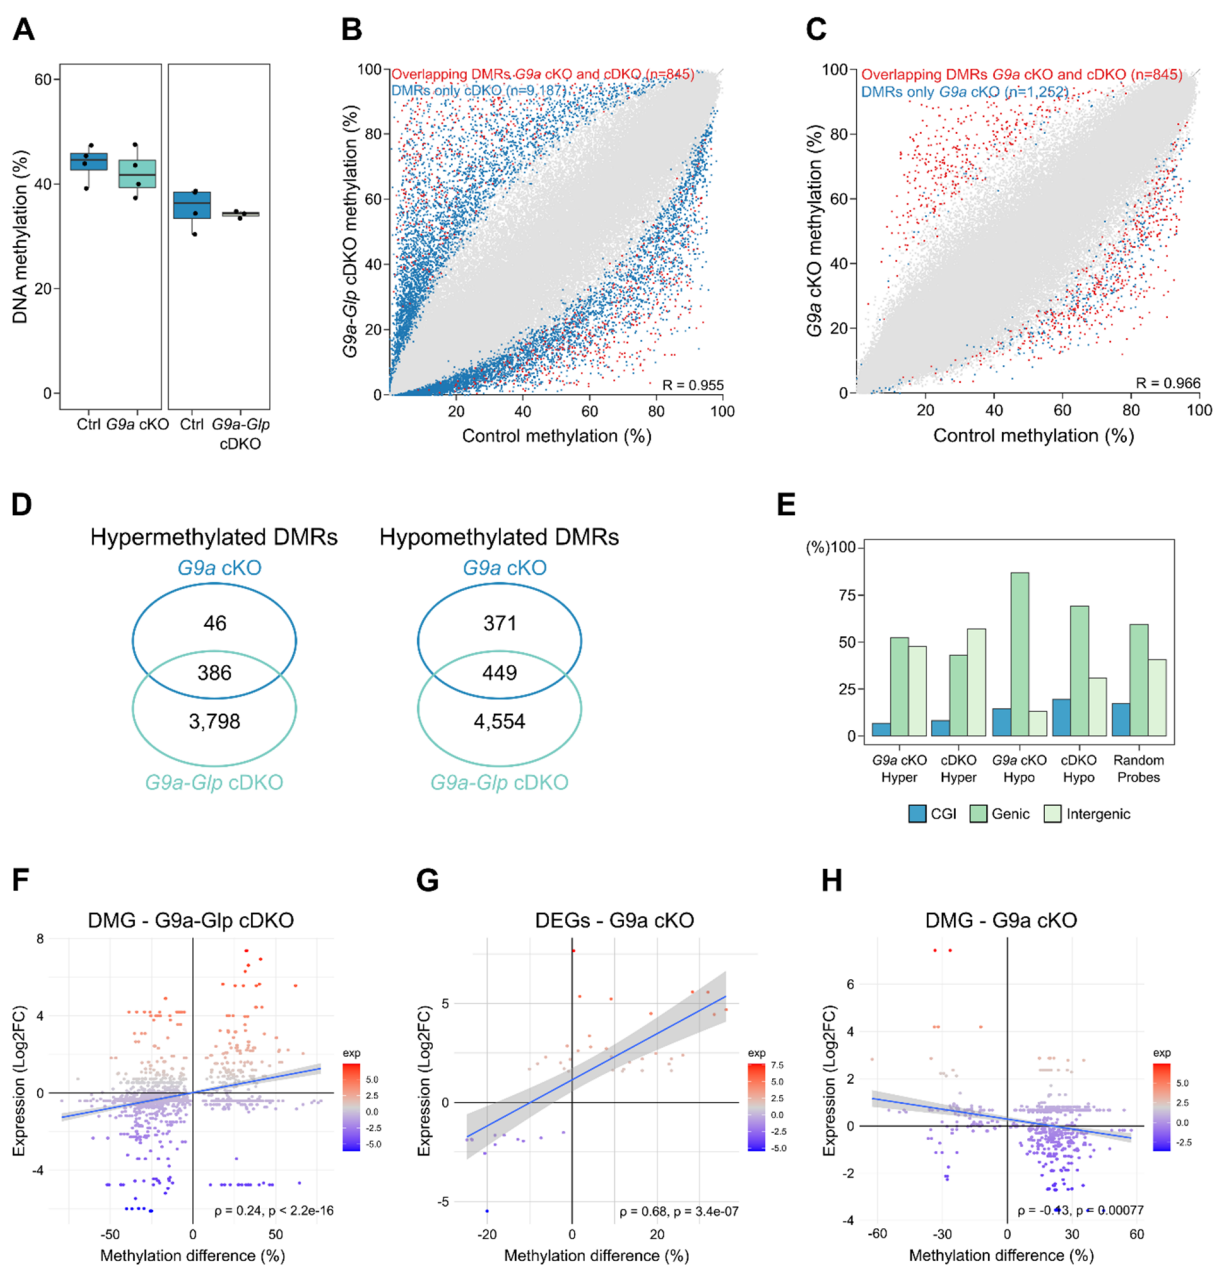

**Figure S5: DNA methylation analysis of *G9a* cKO and *G9a-Glp* cDKO oocytes with corresponding littermate controls.**

**A)** Box-whisker plots showing global DNA methylation levels using average methylation levels of 100 CpG windows. Ctrl vs *G9a* cKO  $P = 0.5378$ ; Ctrl vs *G9a-Glp* cDKO  $P = 0.6077$ . **B,C)** Scatterplot showing methylation levels of control vs *G9a-Glp* cDKO (**B**) and control vs *G9a* cKO oocytes (**C**). Each dot represents the methylation values of a 100 CpG window. Unique DMRs are highlighted in blue and DMRs shared between the two genotypes in red. **D)** Venn diagrams, showing overlap of hypermethylated and hypomethylated DMRs between *G9a* cKO and *G9a-Glp* cDKO oocytes. **E)** Bar chart showing percentage of DMRs and random probes overlapping CGIs, genic and intergenic regions.  $\chi$ -square comparing genic and intergenic DMRs: *G9a* cKO  $adj. P = 0.026^*$ ; all others  $P < 0.0001^{***}$ . **F-H)** Scatterplots showing link between methylation and expression changes of differentially methylated genes (DMG) in *G9a-Glp* cDKO oocytes (**F**), differentially expressed genes (DEGs) in *G9a* cKO oocytes (**G**) and DMGs in *G9a* cKO oocytes (**H**). Expression levels are indicated by the colour scale. Spearman correlation indicated in plot.

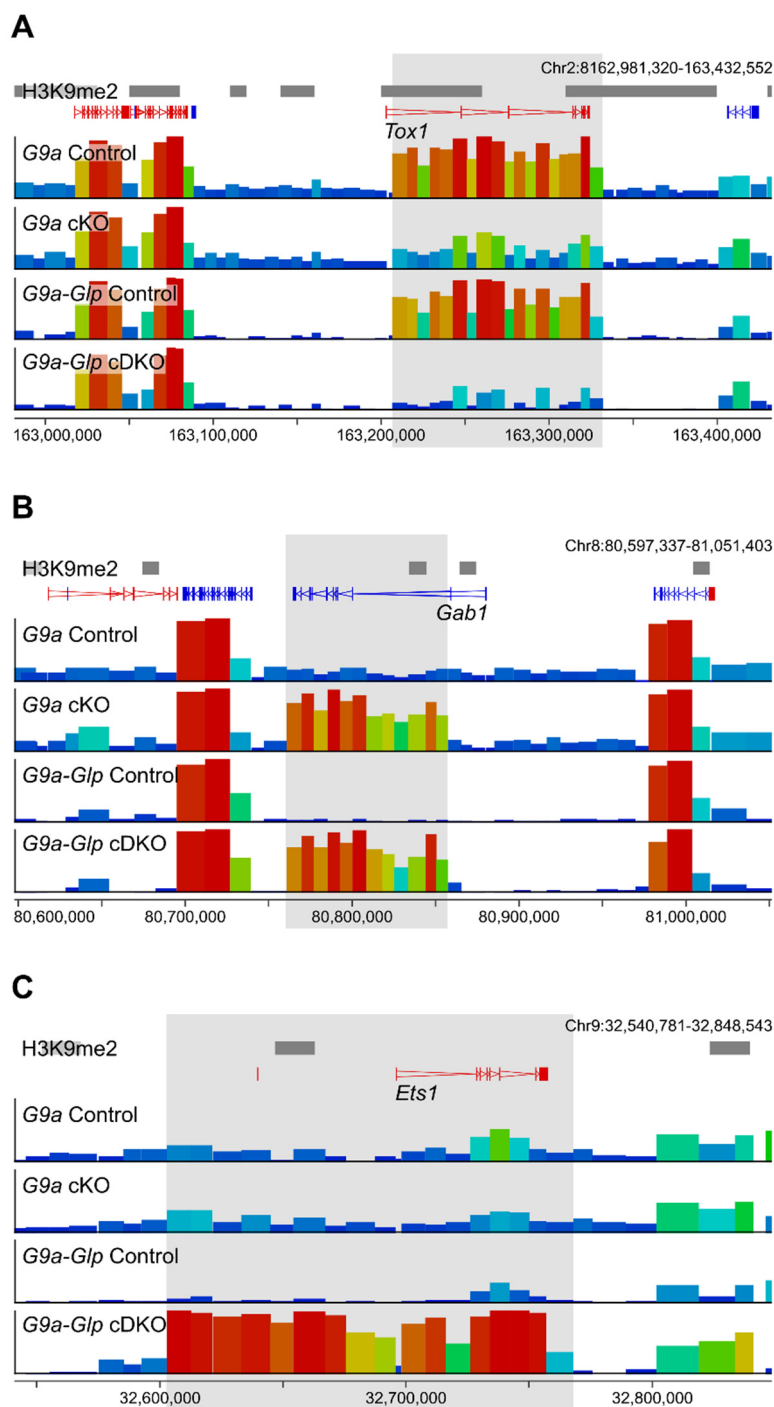

**Figure S6: Genome screenshots showing examples of differentially methylated domains.**

Shown are: a region that is hypomethylated in both *G9a* cKO and *G9a-Glp* cDKO oocytes (**A**), a region hypermethylated in both *G9a* cKO and *G9a-Glp* cDKO oocytes (**B**), and a region uniquely hypermethylated in *G9a-Glp* cDKO oocytes (**C**).
